# Supplementary material for: High Fat Activates O-GlcNAcylation and Affects AMPK/ACC Pathway to Regulate Lipid Metabolism
Source: MDPI journal article supplement (doi:10.3390/nu13061740), 2021-05-21
Supplement: s1 [file s1]

## Supplementary data

Table S1

| Sequences of the PCR primers used in this study for gene cloning and qPCR. |                             |                    |
|----------------------------------------------------------------------------|-----------------------------|--------------------|
| Primer                                                                     | Sequences                   | Primer Information |
| ACC1-ORF-F                                                                 | ATGTTTCCCTGGCTCACGTTTG      | ORF clone          |
| ACC1-ORF-R                                                                 | CTAGGAGGAGGCCGACGTCTCC      | ORF clone          |
| ACC2-ORF-F                                                                 | ATGCTCCCTTTTGCAGTTTTGGG     | ORF clone          |
| ACC2-ORF-R                                                                 | TTAACTGGTGCTGGTGCTGTCCAT    | ORF clone          |
| <i>acc1</i> -F                                                             | GACTTGGC GGAATACCTACTGG     | qPCR               |
| <i>acc1</i> -R                                                             | GCTTGCTGGATGATCTTTGCTT      | qPCR               |
| <i>acc2</i> -F                                                             | AAAGAATCCCTGTGCAGGCTGTC     | qPCR               |
| <i>acc2</i> -R                                                             | TCCTCCTCGGTCCAATCCACTC      | qPCR               |
| <i>fas</i> -F                                                              | CAGCCACAGTGAGGTCATCC        | qPCR               |
| <i>fas</i> -R                                                              | TGAGGACATTGAGCCAGACAC       | qPCR               |
| <i>scd</i> -F                                                              | AAAGGACGCAAGCTGGAACT        | qPCR               |
| <i>scd</i> -R                                                              | CTGGGACGAAGTACGACACC        | qPCR               |
| <i>elovl6</i> -F                                                           | TCAACGAGGACGAAGCCATACGA     | qPCR               |
| <i>elovl6</i> -R                                                           | CCCAGTGCGGACAGCACC AAATA    | qPCR               |
| <i>dgat2</i> -F                                                            | TTCGGTGCTTTCTGCAACTTCG      | qPCR               |
| <i>dgat2</i> -R                                                            | AAGGATGGGGAAGCGGAAGT        | qPCR               |
| <i>cpt1</i> -F                                                             | GCTGAGCCTGGTGAAGATGTTC      | qPCR               |
| <i>cpt1</i> -R                                                             | TCCATTTGGTTGAATTGTTTACTGTCC | qPCR               |
| <i>acads</i> -F                                                            | ACGAGTGGGTGCTGAATGG         | qPCR               |
| <i>acads</i> -R                                                            | TGGATGAGGCTCTGATGCCCAACTT   | qPCR               |
| <i>ehhadh</i> -F                                                           | CCGTGGAGGTCCCATGTTCT        | qPCR               |
| <i>ehhadh</i> -R                                                           | GGCTGCCACTGGCCACGAGCCTCCT   | qPCR               |
| <i>acat1</i> -F                                                            | CGTTGCACCCATTGATTTCC        | qPCR               |
| <i>acat1</i> -R                                                            | GCCTCGTTGATCTCCACAT         | qPCR               |
| <i>acat2</i> -F                                                            | CCTGACAGACGCCTTCCAT         | qPCR               |
| <i>acat2</i> -R                                                            | CCTTCACCTCCACTGAACCTTGTCT   | qPCR               |
| <i>cd36</i> -F                                                             | GAGCATGATGGAAAATGGTTCAAAG   | qPCR               |
| <i>cd36</i> -R                                                             | CTCCAGAAACTCCCTTTCACCTTAG   | qPCR               |
| <i>mtp</i> -F                                                              | CTTGAGTCGCTGATTGCTGC        | qPCR               |
| <i>mtp</i> -R                                                              | TGAGGTCGCTGTAACCCTTG        | qPCR               |
| <i>apob100</i> -F                                                          | AGAGTGTTGTCCAGGATAAAGATGC   | qPCR               |
| <i>apob100</i> -R                                                          | CAGGGCTCAGGGTCTCAGTC        | qPCR               |
| <i>fatp1</i> -F                                                            | CAACCAGCAGGACCCATTACG       | qPCR               |
| <i>fatp1</i> -R                                                            | CATCCATCACCAGCACATCACC      | qPCR               |
| <i>fabp3</i> -F                                                            | CCAAACCCACCACTATCATCTCAG    | qPCR               |
| <i>fabp3</i> -R                                                            | GCACCATCTTTCCCTCCTCTATTG    | qPCR               |
| <i>ogt</i> -F                                                              | ACATGGGTCTGCCTGGCTCTC       | qPCR               |

|                                    |                          |      |
|------------------------------------|--------------------------|------|
| <i>ogt</i> -R                      | ATGCCTGTAGTGTGACCGTTG    | qPCR |
| <i>oga</i> -F                      | ACAGCCGACAGGTGCCTCAG     | qPCR |
| <i>oga</i> -R                      | GCTGCTGGAACACCGTCGTAAC   | qPCR |
| <i>camkk2</i> -F                   | TCACAGAGTACGAGCCCAGTAGAC | qPCR |
| <i>camkk2</i> -R                   | AGCAGGTCGCAGGAAGGAGTC    | qPCR |
| <i>lkb1</i> -F                     | AAGAAGATCGGGATCAGGGGC    | qPCR |
| <i>lkb1</i> -R                     | TGAGGGGTTGGATGAAGAGGA    | qPCR |
| <i><math>\beta</math>-actin</i> -F | GACCTGACAGACTACCTCATG    | qPCR |
| <i><math>\beta</math>-actin</i> -R | AGTTGAAGGTGGTCTCGTGGA    | qPCR |

ATGTTTCCCTGGCTCAGCTTTCGGCGGTGTTTGGCGTCAGTGTCCGGCTGTTTTCTGGTCCCGCAAGCAGCTAACGTCGATAGTATTCCGACGCTGTTCTGTTGCTGCCACCTATGGCA  
M F P P W L T F A A C A L A S V L G L F F W S R K Q L T S I V F A A C S C R P A M A  
CAGCAGGACGGTGCCCGCCGCGCTAAGAAGAACCCGCGCTTCGCGCGTTGCATCTCTCATTTATCGTGGCTCTGTGTCCGAGGAGAACTCGGAAGATGAAATCCAAGGGAAGCTGAC  
Q Q D G A A A A A K K N P A V A A L H S H F I V G S V S E E N S E D E I Q G K P D  
GTTTCAGCTGGAGGAAAAGGAGAATCGGTCTTGTGCGCGTCTCCGCTAGCTCAGACAGACACTGTGAAATGGGATTTGATCACCATTGATGCCCCCGTCAGAAATCTAAGCGCGAGCATG  
V Q L E E K E E N R S L S P S S A S S D S T C E M G F D H I D G P V Q N L R P S M  
TCAGGCTGTCAGCTGGTGAGCAAGCAGAGCATCGCGCGCATCGATCTCCAGAGAGACTTCACCGTGGCTTCTCCTGTAATTTGTCAACCGCTTCGGTGGCAATAAAGTTATTCGAG  
S G I H L V K Q G R D R R R T D L Q R D F T V A S P A E F V T R F G T G G K N K V I E  
AAGGTGCTTATCGCCAACAATGGCATTGACAGCAGTCAAATGCATCGCGTCCATCGCGCGTGGGCTATGAGATGTTCCGCAATGAAAGGGCGATCCGCTTCGTGTTATGGTGACCCCA  
K V L L I A N N G I A A V V K C M S I R R W A Y E M F R N R E A I R F V V M V T P  
GAGGACCTGAAAGCCAACCGGAGTACATTAATAGGCAGATCATTAACGTGCTGTCCAGGAGGACTAAACAACAACACTACGCCAACGTGGAGCTCATTTAGACATTCGTAAACCG  
E D L K A N A E Y I K M A D H Y V P V P G G T N N N N Y A N V E L I L D T A K I  
ATACCTGTTTCAGGCGGTGTGGCGCGGTGGGTTCATGCTTCAGAGAACCCGAACTTCAGAGCTGCTTCACAAGCAGCGCAITGCTTTCATGGTCCCCCAAGTCAGGCTATGTGGCT  
I P V Q A V W A G W G H A S E N P K L P E L L H K H G I A F M G P P S Q A M M W A  
CTGGGAGACAAGATGCTTCTGTTATGTGGCTCAGACAGCTGGCATTCGCCACCTGCCATGAGCGCGGACAGGCTTTCGGTAGAATGGACAGAGAACCAACAAAGAAAGATTC  
L G D K I A S S I V I A Q T A G I P T L P W S G T G L S V E W T E N N Q K K K V I  
AACGTCCCTACTGACGTGTATGAGCTTGCTGCATCCAGGATGTGAGGATGGCTTAAAGTCGACAGAGAATCGGCTACCTGTGATGGTGAAGGCTCTGAGGGAGGGCGGCGAAAA  
N V P T L A D D V Y E L G C I Q D V E D G L K A A E K I G Y P V M V K A S E G G G G K  
GGCATCCGTAAGTGAAGTCGATGATTTCCCAACCTCTTCGACAGGTGTCAGGAGAGTTCAGGCTCGCTGTTTTGTCATGCGACTAGCCAACACGCGCGCTTCGAGT  
G I R K V N C V D D F P N L F R Q V Q A E V P G S P V F V M Q L A K H A R H L E  
GTCAGATCTTGGCTGATCAGTATGGCAATGCCATTTCCTGTTTGGTCGTGACTGCTCCGTGACGAGCGGCATCAGAAAAATATAGAGGAAGCCCCGCTACCATCGCGACCTCGAT  
V Q I L A D Q Y G N A I S L F R G D C S V Q R R H Q K T I E E A P A T I A T S T S  
GTGTTTGAGGATGGAAGGTTGTCAGTGAAGCTGGCTAAGATGGTGGGATACGTACGCGAGGTACAGTGGAGTACCTCTATAGCCAGGACGGCAGCTTCTACTCTGGAGCTCAAC  
V F E D M E R C A V K L A K M V G Y V S A G T V E Y L Y S Q D G S F Y F L E L N  
CCCGCTGTCAGGTGGAGCACCCCTGCACCGAGATGGTGGCTGAGCTCAACTTGCTGCTGCCAACTCGCAGTTGCTATGGGTATTCCTCTTCAAAGGATCAAAGACATCAGGATGCTT  
P R L Q V E H P C T E M V A D V N L P A A Q L Q I A M G I C I A M G I P L Q R I K D I R T M L  
TATGAGTTCAGCGCTGGGAGACTACCCATTGACTTCGAGGCTGTGCGACGCCCTGCCACGGGACACGTACTTGCAGCAGTATACCCAGTGAAAAITCCTGATGAGGGTTTC  
Y G V Q P W G D S P I D F E G L S T A P C P R G H V I A A R I T S E N P D E G F  
AAGCCAAAGCTCCGGAACAGTGAAGATTTGAATTTCCGACGAAATAAAAGCTGTGGGCTACTTCAGCGTGGCAGCGGCTGGAGGCTCCACAGATTTCGCTGACTCCGATTGTGACAC  
K P S S G T V Q E L N F R S N K N V W G Y F S V A A A G G L H E F A A S D Q F G H  
TGTTTCTCTTGGGAGAAATCGTGAAGAAGCCATTCCAACATGGTGGTCTCGAAGGAGCTGTCTATCAGAGGAGACTTCAGGACCAAGCTGAATAACCTCATTAAGCTGCTGGAG  
C F S W G E N R E E A I S N M V V A L K E L S I R G D F R T T V E Y L I K L L F  
ACGAAAGCTTTTCAGCACACAGCATCGACACTGGCTGGCTGGACAGGCTGATCTCAGAGAAGATCAGCGCGAGGCGCCCTGCACCATGCTGGGAATCGTGAGTGGGGCTTTCACGTG  
T E S F G Q H N S I D T G W L D R L I S E K M Q A E R P D T M L G I V S G A L H V  
GCAGATGTCAACTTCAGGAACAGTGTCTCCAACCTTCTGCTGCAITTTCTAGAAAGGGGCGAGGTGCTCGCGGACACACACTACTCAACACTGTGGATGTGGAGCTGATCTATGAAGCACT  
A D V N L R N S V S N F L H S L E R G Q V L P A H T L L I N T V D V E L I Y E G T  
AAGTACGTCTGACGCTGACGGCGCAGTCTCCCAACTCTACGTGGTATCATGAACAACCTCTCCGCTGAGGTGGAGCTCCATCGGCTCAGCGATGGAGGCTCTTTGCTGTCTTATGAC  
K Y V L T V T R Q S P N S Y V V I M N N S A E V D V H R L S D D G G L L S Y D  
GGAAGCAGCTACACTACATACATGAAAGAAAGGAGTGGACAGGTATCGCATCACAATGGGAACAAGACTTGTGTTTCGAAAGGGAGAACGACCTTGGCTGCTACAGTCTTCTCTCAGCG  
G S S Y T T Y M K E E V D R Y R I T I G N K T C V F E R E N D P S L L R S P S A  
GGAACACTTCCAGTACACAGTCGAGGATGGCGGACATGTGTTTTCGCCAGTGTACGCTGAAATAGAGGTGATGAAGTGTAAATGACCTTACGGCTGCAGAGTCTGGATGATT  
G K L I Q Y T V E D G G H V F S G Q C Y A E I E V M K M V M T L L T A E A S K I  
CACTATGTGAAGAGAGCTGGAGCGGCACTGGATCGGCTGTGTGATTGCCAAGCTACAGTGGATGCCAACGCGGATGCAACAGGCGAGAGCTGCACACAGGGGCTTGCTTCTATC  
H Y V K R A G A A L D P G C V I A K L Q L D P S R V Q Q A E L H T G A L P S I  
CAGGCAAGTACGCTTGAGAGGAGAGAAGCTGCACAGACTTTCCACAAACACACTGGATCATCTGCTTCACATAATGACAGGCTACTGCTCTCTGAGGCTTTCTTCAGTGTCAAACTGAA  
Q A V A L R G E K L H R V F H N T L D H L V H T M N G Y C L P E P F F S A K I K  
GAGTGGGTGGAAGGTTGATGAAACCATCGGTGATCCCTCTTGCCACTGTTGGAACCTCAAGACATCATGACCAGTGTGTCTGGTCATCCCTCCTGCGTGGAGAAGGCTATCAAG  
E W V E R L M K T M R D P S L P L L E Q D I M T S V S G R I P P A V E A K A I K  
AAAGAATGGCTCAGTATGCGAGCAACTACCTTCGCTGCTGCACTTTCCAGCCAGCAGATCGCGAACATCCTGGACGCCATCTGCTACTCTCTAAACAAGAGCTCAGAGAGGAGAA  
K E M A Q Y A S N I T S V L C Q F P S Q I A N I L D S H A A T L N K K S E R E  
GTCTCTTTTATGAACACAAAGCATTGTTTCAGCTGGTACAGAAATATCGAGTGGCATCCGAGGTACATGAAGGCCGTGGTGATGGACCTGCTGAGACAGTACCTGAAAGTAGAGATC  
V F F M N T Q S I V Q L V Q K Y R S A A G I R G H M K A V V M D T L R Q Y L K V E I  
CAGTTTTCAGAATGGACACTACGACAAATGTGTGTGCGACTACGTGAGGAAACAAAGCGACATGTCCAATGTGCTCAACTATATCTTCCCAGTCAAGTACCAAGAAAGAACCTG  
Q F Q N G H Y D K C V F A L R E E N K G D M S N V L N Y I F S H A Q V T K K N L  
CTGGTTACCATGCTGATTGACCAGCTCTGTGGCGCGATCCACGCTGACAGATGAAGTGTGCCATCTTGACTGAACTACCCAGCTCAGACAAAACGACCAACGCGAAGGTGGCACTG  
L V T M L I D Q L C G R D P T L T D E L M A I L T E L T Q L S K T T N A K V A L  
CGTGCCCGACAGGTGTGATCGCTTCTCATCTCCCTCATACGAGCTACGACACACAGGTTGGAGTCCATCTTCTCTGCCATCGATATGTACGGGACCAGTCTGCGATTGAAAAC  
R A R Q V L I A S H L P S Y E L R H N Q V E S I F L S A I D M Y G H Q F C I E N  
CTGCAGAAATGATCCTTTCGGAACATCCATCTTTGATGTTCTGCCAACTTCTTACCACAGCAATCAGGTAGTCAGGATGGCTGCCCTTGAGGTGACGTTGCGAGAGCATACATT  
L Q K L I L S E T S I F D V L P N F F Y H S N Q V V R M A A L E V Y V R R A Y I  
GCGTATGAGCTGAACAGCGTTTCAGCATCGGCGAGCTGAGGACCAACAGTGTATAGTAGTTCAGTTTCATGCTTCCCACCTCGCACCCAAACAGAGGGAACATCCCCACTCTAAACAGG  
A Y E L N S V Q H R Q L R D N T C I V E F Q F M L P T S H P N R G N I P T L N R  
ATGTCATTCTCGTCTAACCTAAACCACTACGGCATGGTGCATGTAGCCAGCGTCAGTGACGTTCTGCTTGACACATCTTTTACCACCTTGTACGGCATGGGAGCCATGGTCGTTTC  
M S F S S L N H Y G M V H V A S S S D V L L D T S T F P P C Q R M G M V A F  
CGCTCCTTCAGGAGTTTCAAGAAGCACTCGCAGAGCGTTGTAGCTGTCTTCCGACTCTCTCCCCCAAGTCCAACCTTCCAGAGGGAGGTAATCTGCTGCTGATGGCGAAGAGGAC  
R S F Q E F T R N I A D V L S C F S D S P P S P T F P E G G N P V L Y G E E

AACAAGAGTGTCCAGGACGACCTATCCATATCTTGAATGTGGCTATAAAGACCGACAGCGACATCGACGATGACGGCCTTGACGCCAATTTAGAGAGTTCAGTTCAGTCAAAGAAATCG  
N K S V Q D E P I H I L N V A I K T D S D I D D D G L A A N F R E F T Q S K K S  
CTGCTGTTTGAACACGGAATCCGTAGGCTGACTTTCCTTGTGGCTCAGAAGGATTTCAAGGAAGCAAGTCAACTGTGAGGTGGACCAAGGTTTCATAGAGAATTCACAAATTTTTCACA  
L L F E H G I R R L T F L V A Q K D F R K Q V N C E V D Q R F H R E F P K F F T  
TTCCGCGCCAGAGATAAGTTCGAAGAGGACAGGATCTATCGTCATCTAGAGCGGCGCTCGCTTTCCAGTTGGAGCTCAACCGCATGCGCAATTTGGCTTAAGTCCATCCCGTGGCGC  
F R A R D K F E E D R I Y R H L E P A L A F Q L E L N R M R N F A L T A I P C A  
AACCACAAGATGCACCTGTACCTGGGTGCAGCCCGGTGGAGGTGGGCACAGAGTTACGGACTACCGTTTCTTTGTGCGAGCCATTATCCGCCACTCTGATCTGGTACCAAGGAGGGCC  
N H K M H L Y L G A A R V E V G T E V T D Y R F F V R A I I R H S D L V T K E A  
TCTTTTGAATACCTTCACAATGAGGCAGAGCGTCTGCTGCTGGAAGCCATGGATGAGCTGGAGGTGGCTTTCAACAACACAAGTGTACGGACCGACTGCAATCACATCTTCTCAATTTT  
S F E Y L H N E A E R L L L E A M D E L E V A F N N T T V R T D C N H I F L N F  
GTCCCCACAGTCATTATGGACCCATCAAAGATCGAGGAGTCCGTGCGCTCCATGGTGTGCTTACGGCAGCCGTCTGTGGAAGCTGCGCGTCTGACGGCCGAGCTGAAATCAACATC  
V P T V I M D P S K I E E S V R S M V M R Y G S R L W K L R V L Q A E L K I N I  
CGCCTGACTCCAACAGGAAGCAAAATCCCCATCCGCTCTTCTCACTAATGAATCGGGCTACTATCTAGACATCAGCTTGTACAAGGAGGTCACTGATTTCCCGAACGGGACAGGTGGG  
R L T P T G K Q I P I R L F L T N E S G Y Y L D I S L Y K E V T D S R T G Q V G  
CCCAAGACCGACAGATCATGTTCAAGCATATGGAGACAAGCAGGGTCCGTGGCATGGCATGCTCATCAACACCCCGTATGTACCAAGGATCTGCTGCAITCGAAGCGCTTCCAGGCA  
L H D R H I M D P S K I E E S V R S M V M R Y G S R L W K L R V L Q A E L K I N I  
CAGTCTCTGGGCACCACTACGTCTACGACTTCCAGAAATGTTACAGACAGGCTCTAAAAAGCTGTGGCACTCCAGCCAGGCGCTTGGCCACTTACCCAGATGCCCGCTCCCTTCTGAG  
Q S L G T T Y V Y D F P E M F R Q A L K K L W H S S Q A F A H I L P R C P L P S E  
CTGCTCACATTCACAGAGCTGGTTCGACGCCCAAGGTCAAGTGGTGCAGATGAACCGACTGCCAGGGGGCAACGAGATTGGTATGGTGGCATGGCGGATGACCTTGGCACGCCAGAA  
L L T F E N L K G S A Q I A G E S S L A Y E E I I T M N L V T C R A I G I G A Y  
TATCCGGCGGGACGCGAGATCATCGTCATAAGTAATGACATCAGCACAAGATTGGCTCGTTCGGGCCCCAGGAGGAGTGTCTGCTGCGAGCTTCAGAGATGGCCCGGAGAGCGGC  
Y P A G R E I I V I S N D I T H K I G S F G P Q E D V L F L R A S E M A R E S G  
ATCCCGGGATCTACATCGACGCCAACAGCGGCGCCCGCATCGGGCTGGCAGGAAATCAGACATGTTCCAGTGGCCTGGCAAGATCCAGCTGACCCCTATAAGGGCTCAAGTAT  
I P R I Y I A A N S G A R I G L A E S S L A Y E E I I T M N L V T C R A I G I G A Y  
CTCTACCTCACACCTCAGGATTACAAGAAAGTTTACGGCTGAATCCGTGCATTTGTAACATGTGGAAGATGAGGGAGAATCCAGGTACAAGATCACGACATCATAGGAAAGACGAA  
L Y L T P Q D Y K K V S A L N S V H C E H V E D E G E S R Y K I T D I I G K D E  
GGGCTGGTGTGGAGAATCTGAAGGGTCTGGAATGATTGCGGAGAATCCTCTGCGTTACGAGGAGATCATCACCATGAACCTGGTCACATGCAGAGCCATAGGAATCGGGGCTAT  
G I Q I M H N N G S F M E I M Q P W A Q S V V V G R A R L G G I P T G V V A V E T  
TTGGTGAGGCTCGGGCAGAGAACCATTCAAGTGGAACAATCTCATATTATCTTACTGGAGCTGGAGCACTCAACAAGGTGCTGGGTAGAGAAGTCTACATCAACAACAGGCTGGT  
L V R L G Q R T I Q V D N S H I I L T G A G A L N K V L G R E V Y T S N N Q L G  
GGAATCCAATCATGCACAACAGCGGTGACCCACTGCACCGTTTGTGAGACTTTGAGGGAGTCTTACACTTCTGCAAGTGGCTGTCTACATGCCATGTGCAAAATCTAGTCCGGTG  
Q N G F F D H G S F M E I M Q P W A Q S V V V G R A R L G G I P T G V V A V E T  
CCTATCGTCCATCCAAGGATCCCATAGATCGGCGGTGGAGTTTGTGCTACAAAGGCTCCCTACGACCTCGCTGGATGTTAGCGGGCGTCCAGCCAGACTCCAAAGGGTTCCTGG  
P I V H S K D P I D R P V E F V P T K A P Y D P R W M L A G R P S Q T P K G S W  
CAGAATGGCTTCTTGAACATGGTTCCTCATGGAATCATGCAGCCTTGGGCTCAGAGTGTGGTGGTAGGCAGAGCCAGACTTGGCGGAATACCTACTGGAGTGGTGGCGTGAAACC  
K I D S R G G V L E P E G T V E I K F R R K D L V K T M R R V D P V Y M G L A E K  
AGGTGAGTGGAGTCTCCATCCCCCGATCGGCCAATTTGGACTCAGAAGCAAGATCATCCAGCAAGCAGGACAGGTGTGGTTCAGATTTCTGTTTCAAAACAGCTCAGGCTATT  
R S V E L S I P A D P A N L D S E A K I I Q Q A G Q V W F P D S A F K T A Q A I  
AAGGACCTGAACAGGGAGGGCTACCTCTCATAGTGTGTTGCAACTGGAGGGGCTTTTCTGGAGGAATGAAAGATATGTACGACCAGGTGTGAAGTTCGGGGCTACATCGTGGAGGG  
D T P G R M Q E K G V I T D I L E W Q T S R Q F F Y W R L R R L L L E E T V K R  
TTGAGGAGTACCAGCAGCGGTGCTGTTTATATCCCCCAGGCTGAGCTGAGGGGAGGATCCTGGGTAGTTATAGATCCAACCATCAACCCCTCGTCACATGGAGATGTACGCTGAC  
L R E Y Q Q P V L V Y I P P Q A E L R G G S W V V I D P T I N P R H M E M Y A D  
AAGGACCGCGAGGTGAGTGTGAGCCCGAGGCAACAGTGGAGATCAAGTTTAGGAGGAAGGACCTGGTGAAGACCATGAGAAGAGTATAGTCTGCTACATGGGCTTGGCTGAAAA  
K I D S R G G V L E P E G T V E I K F R R K D L V K T M R R V D P V Y M G L A E K  
TTGGGAACCCAGAGCTGAGTCCCCCGATCGTAAAGAGCTGGAGACCAAGCTGAAGGAGCTGAGGAGTTTCTCTGCCCATCTACCACAGGTGTGTGTGAGTGTGCTGACCTCCAC  
L G T P E L S P P D R K E L E T K L K E R E E F L L P I Y H Q V A V Q F A D L H  
GACACACCGTGCATGCAAGAGAAGGGTGAATAACGACATCCTTGAATGGCAACGTCGCCGTCAGTCTTTTACTGGCGTCTGCGGCGCTGCTGCTGGAGAGACGGTGAAGAGA  
D T P G R M Q E K G V I T D I L E W Q T S R Q F F Y W R L R R L L L E E T V K R  
AAGATCCAAGCGGCCAACAGCGAGCTGACAGACGGTCAGTCCAAGCGATGCTGCGCGCTGGTTCGTAGAGGCCGAGGGTGGGTCAAGGCCTATCTGTGGGATAACAATGAAGAGGTG  
K I Q A A N S E L T D G Q V Q A M L R R W F V E A E G A V K A Y L W D N N E E V  
GTGGGATGGCTGGAGGCACTAGCTGAAGAAGAGGGCGGAGGTCCGTCATCGACGAGAATCAAGTACATCCGCCGAGATCACATCTCAAGCAGATACGCAAGCTTGTCCAAGCC  
V G W L E R Q L A E E E G A R S V I D E N I K Y I R R D H I L K Q I R S L V Q A  
AATCCAGAGGTGCGCATGGATTCCATTGTGCATGACCCAGCACATCTCGCCACGACAGAACCGAGGTGGTACGTATCTGTCCACCATGGAGAGCTGCGCTCTCTTAG  
N P E V A M D S I V H M T Q H I S P T Q R T E V V R I L S T M E T S A S S \*

**Figure S1 Nucleotide and deduced amino acid sequences of *accI* gene.** The start codon (ATG) and the stop codon (TGA) are in bold.



ATGCTCCCTTTTGCAGTTTGGGATTAATCCTATGGATTTCATTGCTACTGTGGAGGATTATCACCAAGGCAGTAGCGATGCCCGTGAAGGAGAGGAATCTCCGCTGGCTGTGGTCCG  
M L P F A V L G L I L W I S L L L W R I I T K A V A M P V K G E E S P S G C G P  
CCTGCAGCTGAGGAGGACATGCCTGTTACACAATCCCCTCATCCAGGCGAACATTCCCTGTCAACAGCCCCCTACTACCTCAGCGCACAAATGAGGATAACAGTTCTCAGGCCGGCTGTGCC  
P A A E E D M P V T Q S P H P G E H S L S T A P T T S A H N E D N S S Q A G C A  
CCTGCAGGTCAAGTTAAAGCAGTGGACAGAGGCTCTGCAGGAGTCCCTGTAGAGTAAATTCAGAAAACCAACACACAGACATCTTCCAAAACCAAGTGCCAATGGTCAAAATCA  
P A G Q V K A V D T E A L Q E S S E V N S E K P P T T Q T S S K T K V P M L K S  
GGGCTGAGGGAGGGAACGCTCAAGTTCAATCTCGGAGCATCTGAGGATAACTCTTCAGACGAGGAGCCTCTGGTTAGCAAACTCCAAGTGGCGCATCTCAGCCACCGGCTCCACA  
G P E G R E R L K F I L G A S E D N S S D E E P L V S K P P S G A S Q P P A S T  
AGCAAACTCTTATCCCAAGGAGGATCCACAGCAGCAGCATCCAGCTCCAGCATCAAGCCTAGCGATGTCTGGTCTTCACTTGGTGAGAAAAGGACGGACACAGAAAGATGGAT  
S K S Y P Q E G S T A A R R S S S S G I K P S M S G L H L V R K G R E H R K M D  
CTCCAGAGGGGACTTCACTGTGGCTCTCCTGCTGAGTTTGTCACTAGATTGGTGGAACCGTGTTCATTGAAAAGTGCTGATAGCTAACAAATGGCATTGCTCGGTAAAATGTATGCGC  
L Q R D F T V A S P A E F V T R F G G N R V I E K V L I A N N G I A A V K C M R  
TCTATCCGTGCTGCTTACGAAATGTTTCGCAACGAGAGGACCATCCGTTTTTGGTGCATGGTAACCCCTGAAGACCTGAAGCAATGCAGAAATACATTAATGGCAGACCAATTAT  
S I R R W S Y E M F R N E R T I R F V V M V T P E D L K A N A E Y I K M A D H Y  
GTTCTCTAGCCGGTGGGCCAACAAATAACAACCTACGCCAGCTAGAGCTGATAGTAGACATTGTAAAGAAATCCCTGTGCAGGCTGTCTGGCTGCATGGGTCATGGCTCTGAAAAT  
V P V P G G P N N N N Y A N V E L I V D I A K R I P V Q A V W A G W G H A S E N  
CCCAAACTCTTATCCCAAGGAGGATCCACAGCAGCAGCATCCAGCTCCAGCATCAAGCCTAGCGATGTCTGGTCTTCACTTGGTGAGATAAAGTGGCTTCTTATCTATCGGATGCTGACATT  
P K L P E L L N K A G I S F L G P S S K A M W A L G D K V A S S I V A Q S A D I  
CCCACTACCTTGGAGCGGATCAGGTCTAAGAGTGGATTGGACGAGGAGGACAAAACCTGGGCAACGTAATCAGTGTCTCCTCAGAGATCTATGCAACAGGCTGTGTTCGGGATGTT  
P T L P W S G S G L R V D W T E E D Q K L G N V I S V P S E I Y A N G C V R D V  
GATGATGGCTGGCAGGCTGAGAGATTGGTTATCCGTTGTTATCAAGGCTCTGAGGCTGGAGGTTGAAAAGGCAATCCGTAAGTAGAATGCTCTGAGGATTTCCAGGTTCTTT  
D D G L A G A G E R I G Y P V I K A S E G G G G K G I R K V E C S E D F P G F F  
AGACAGGTTACAGACAGAGGTACCGGTTCCCTATCTTCGTCATGCAGCTAGCTCAGCAGCCAGACACCTTGAGGTTAGATACTGGCTGATGAGTATGGAATGCCATCTCTCTGTT  
R Q V Q T E V P G S P I F V M Q L A Q H A R H L E V Q I L A D E Y G N A I S L F  
GGACGAGACTGCTCCATCCAGAGGAGCACCAGAAGATTATAGAGGAGCTCCGGCCACCATTGCTGTACTCAACATTGAGCAAAATGGAATGGTGCTGTGCGCATGGCCAAAGATG  
G R D C S I Q R R H Q K I T E E A P A T I A A T S T F E Q M E W C A V R L A K M  
GTTGGCTACGTGAGCGCAGGTACCGTGAATATCTCTCTCTGAAGACGGAATTTCCATTTCCTGGAGCTGAATCCTCGCTGCAGGTGGAACATCCCTGTACAGAGATGATCGGAGAT  
V G Y V S A G T V E Y L F S E D G N F H F L E L N P R L Q V E H P C T E M I G D  
GTAACCTGCCAGCTGCCAGCTTCAGATTGCGATGGGCATCCCCCTTATAGAATTAAGGACATCCGTTACTTATGAGAGACTCCGTGGGTGATACCATCATTAACTTTGAAACT  
V N L P A A Q L Q I A M G I P L Y R I K D I R L L Y G E T P W G D T I I N F E T  
CCAGACTGCATACCAAGTCCAAGAGGCGACGTCATAGCTGTGCGATCACCAGTGAGAACCCTGATGAGGGGTTTAAGCCAGTTCGGGCACAGTGCAAGGAGCTGAACCTCCGACGACGT  
P D C I P S P R G H V I A A R I T S E N P D E G F K P S S G T V Q E L N F R S S  
AAAAACGTGTGGGTTATTTCAGCGTGGGAGCAACTGGTGGCTGTCATGAATTTGCCGACTCCAGTTTGGACACTGTTTCTCCTGGGAGAGAAATCGTGAAGAAGCAATTCGAACATG  
K N V M G S K V S W G A T G L H E F A D S Q F G H C F S W G E N R E M S D S Y  
GTGCTGGCTATGAAGGAGCTGCCATCAGAGTGACTTCAGGACCACGGTTGAGTACCTCATCAAGTTACTGGAGACAGAATGCTTCAGAAACAATGACATCGACACGGGGTGGCTGGAT  
V V A M K E L S I R G D F R T T V E Y L I K L L E T E C F R N N D I D T G W L D  
CATCTGATTGCAGAGAAAGTGACGGCGGAGAGACAGATACGATGCTGGGATTGTTTGTGGGCTTTGTCATGTTGCTGATGCGAGCTTCGAAAGAGCATGTCTGATTACCTGCATCA  
H L I A E K V S I A E R P D T M L K I G T I E E A P A T S T F E Q M E W C A V R L A K M  
CTTGAAGAGGGCAAGTACTGCTCGGGCAGTCTCCTCAACTCTGTACGGTGGACCTAATATATGAAGGAGTCAAGTACTGCCTCAAGGTGGCTCGCCAATCTCCGACAACTTACGTC  
L E R G Q V L P A A S L L N S V S V D L I Y E G V K Y C L K V A R Q S P T T Y V  
ATCATGATGAACGGCTCCAACATCGAGATAGATGTCCACAGGTTGAGCGACGGTGGCCTTCTGCTGCTTATGACGGCAGCAGCCACACCACCTACATGAAGGAGGAAGTGGACAGCTAC  
I M M N G S I E I D V H R L S D G G L T S Y D G S S H T T Y M K E E V D S Y  
CGCATCACTGTTGGCAACAAGACGTGTGTATTGAGAAGGAGAAGGATCCACGGTGTGAGGTTCGCCCTCTGCTGGCAACTGCTTCAGTACATCTGTGAGGATGGAGCTCACGTTTGT  
R I T V G N K T C V F E K E K D P T V L R S P S A G K L L Q Y I C E D G A H V C  
GCAGGAGAGACCTACGGCGAGATCGAGGTTCATGAAGATGGTATGACATTGACTGTGACGAGCTGTGGTTGATTCAATTTGTCAAGAGACCTGGAGCTGTTCTGGAGCCGGGCTGTGTG  
A G E T Y A E I E V M K M V M T L T V Q Q S G C I H F V K R P G A V L E P G C V  
GTGGCACAATAGAGCTAGATACCCGAGCAGTATACATCTGGTGGAGCTCAACAGGCCATACTACCACACAGCAACCCCTGCCCATTTGTTGGGGAAGCTTCACCAAGGTGTTTCAC  
V A H I E L D D P S S I H L V E L N T A I L P P Q Q P L P I V G E K L H Q V F H  
AGTGTGCTGGAACCTTGGGTAAGTTCATGGATGTTACTGCTTGGAGAGCCGTTATTACGACGCAAGCTCAAAACAGTGGGTGACTACCTGATGAAGACTTTAAGGGACCCCTCACTA  
S V L E N L G K V M D G Y C L E E P L F S S K L K Q W V T T L M K T L R D P S L  
CCGCTGCTGGAACCTTCAGGAGATCATGACGAGTGTGGGGGTGGATTCTCCCGGTGTAGAGAAAGATATCCGTAAGTCAATGGCTCAGTATGGCAGCAACATCACCTCTGTCTCTGC  
P L L E L Q E I M T S V G G R I P P G V E K D I R K V M A Q Y A S N I T S V L C  
CAGTTCCTAGCCAAAGGATTGCAACGTTTATGACAGCATGCAGCAACCTGCAGAGGAAGCTGATCGCGAGGTGTTCTTCATGAACACTCAGAGTATTGTTCACTGGTGCAGAGG  
Q F P S Q R I A N V L D S H A A T L Q R K A D R E V F F M N T Q S I V Q L V Q R  
TACCGCAGTGGAACTCCGTGGTTATATGAAGTCTGTGGTTCTCGATCTGCTGAAGCATACCTGCAAGTAGAGATGCAGTTTCAGCAAGCTCACTATGACAAGTGTGTCACTCAACTGAGA  
Y R S G I R G Y M K S V V L D L L K R Y L Q V E M Q F Q Q A H Y D K C V I N L R  
GAGCAGCACAACCTGACATGAGTCGCGTGTGGAGTACATCTTCTCTCATGCCAAGTCTCCAAGAAGAACATCCTTGTCACAATGCTCATAGACCAGCTGTGTGGAAGAGATTCAACG  
E Q H K P D M S R V L E Y I F S H A Q V S K K N I L V T M L I D Q L C G R D S T  
CTAGCAGAAGAGCTATGGCCATTTTGAACGAGCTCACGAGCTTAGCAAGTAGGAACTCAAAGTTGCTTGAAGCCAGACAGGTTTGTATGCTCCCATTTACCATCATACGAA  
L A E E L M A I L N E L T Q L S K M E N S K V A L R A R Q V L I A S H L P S Y E  
CTGAGGCACAACAGGTGGAGTCCATCTTCCTGTACGCTATGACGCGACCAAGTTCTGTCCGAAACTTGAAGAACTTATCCTCTGAAACCTCCATTTTGAAGCTTTTG  
L R H N Q V E S I F L S A I D M Y G H Q F C P E N L K K L I L S E T S I F D V L  
CCCAATTTCTTATCACTCAATCAAGTTGCTGATGGCTGCCCTGAGGTTAGTACGACAGCTTACATCGCCTATGAGCTGAATAGACTCCAGCATCACCAGCTGCAGAGTGCAGAGT  
P N F F Y H S N Q V V C M A A L E V Y V R R A Y I A Y E L N S I Q H H Q L Q D G  
TCGTGCGCTGATGACTTCCAGTTCATGCTGCCCTCATCATCCGAACAGAGGAGCAGCCCTACTCTGAACAGGGTTCGCCGTGCCAGTCAGTGATCAGCGCAGTTTAAATGAGGCGA  
S C A V D F Q F M L P S S H P N R G S S P T L N R V P V P V S G S G Q F K M R R

CAGAGCAGTGAGCTTCTCTGGAGGGAGCCTTGCTCCACCTGCCAGCGCATGGGCGCCATGGTGGCTTCCAGTGTTTGATGACTTCAAAAGGAATGTCGATGAAGTTCTCCAGC  
 Q S S E L F L E G A L S P P C Q R M G A M V A F Q C F D D F K R N V D E V L S S  
 TTTCAGAACCACTCTTAGAGAGCTCTCCGTTCTCAGAGGCTGTTCCAGTCTCTATGAGGATGAGAACCTCAAGAATACGAGGGAGAACCCAATCCACATCATTAAATGTGCCATAAAA  
 F A E P L L E S S P F S E A C S S L Y E D E N L K N T R E N P I H I I N V S I K  
 ACAGCCGACACTGAAGATGACGATGCGTTGGTCACAGCCCTCACTGCCTTTGCCAGTCAAAGAAAGCTGCTCTTTGAGTACGGAAATAGGAGAAATCACATTTTGATTGCACAGAAG  
 T A D T E D D D A L V T A L T A F A Q S K K A V L F E Y G I R R I T F L I A Q K  
 AGAGAATTTCCCAAGTTCTTACCTTCAGAGCTAGAGATGGGTTCAGGAGGATCGCATTTATCGTAATCTGGAGCCAGCTTTAGCGTTCCAGCTGGAGCTCAACCGCATGAGGAACCTT  
 R E F P K F F T F R A R D G F Q E D R I Y R N L E P A L A F Q L E L N R M R N F  
 GACCTGACGGCGTTCCCTGCGCAACCAAGATGCAACTCTACCTCGGTGCTGCTGCTGTCAGGAGGGGGCAGAAGTACGGACTACCGATTCTTCATACGAGCTATTATCGCCAC  
 D L T A V P C A N H K M Q L Y L G A A R V Q E G A E V T D Y R F F I R A I I R H  
 TCAGATCTCATTACAAAGAGCGCTCCTTTGAATACCTTCAAAATGAAGGAGAAGCTCCTCTTGGAGGCCATGGATGAGTTGGAGGTGGCTTACAGTAACACCGCGTCCGACAGAC  
 S D L I T K E A S F E Y L Q N E G E R L L L E A M D E L E V A F S N T S V R T D  
 TGCAACCATATCTTCTCAACTTCGTCCCACTGTCATCATGGACCCCTCTAAATAGAGGAGTCTGTTCGCTCCATGGTGATGCGCTATGCGAGCGCTCTTGGAAAGCTGAGGGTCTTG  
 C N H I F L N F V P T V I M D P S K I E E S V R S M V M R Y G S R L W K L R V L  
 CAGGTCAGCTGAGCTAACATACGCTGACACCACTGGGAATGCCATTCCTGTCGCGCTTTCTCACTAATGAATCTGGCTATTACTGTGACATTAGCCTGTATGACAGGAGGTCAC  
 Q A E L K I N I R L T P T G N A I P V R L F L T N E S G Y Y L D I S L Y K E V T  
 GACCCAAGTTCAGGACAGATCATGTTCCAGTCTGACGGAGATAAGCAGGGTCTCTGATGGATGCTGATCAACACTCCATATGTACCAAGACCTCTGCGAGCGCAAGCGTTTCCAG  
 D P S S G Q I M F Q S Y G D K Q G P L H G M L I N T P Y V T K D L L Q A K R F Q  
 GCTCAAACTGAGCTGAGCTACATACGCTACGACTTCCTGAGATGTTCAGAGAGTGTTCGCGCTGTTTAAAGCGTGGGTTTCGGGGACAAACCCCTAAAGAGCTGTGATGACAGGTCG  
 A Q T L G T T Y V Y D F P E M F R Q A L F K Q W G S G D K H P K D V L M C T E L  
 GTTCTGACCTCAAGGTGAGTTGTGACAGATGAATCGCTGCGTGGAGCAATGATGTGGAAATGGTTGCCTTCAGGATGAAGATGAAGACTCCAGAGTACCCAGAGGCGAGAGATATC  
 V L D P Q G R L V Q M N R L P G D N D V G M V A F R M K M K T P E Y P E G R D I  
 ATGCTTATCTAGCAAGATCACTACATGATCGGATCATTGGCCCTCCAGAGGATGAGTGTTCCTTAAGGCGTCAGAGTTGGCTCGGGCTAAAGGCGATCCGCGCATTCAGTCGCA  
 I V I C N D I T H M I G S F G P P E D E L F L K A S E L A R A E G I P R I Y I A  
 GCCAACAGTGGCGCGCATCGGCTCGCTGAAGAGATCAACACATGTTCCAGTGGCTGGATTGACCCCTCTGACCCCTACAAGGGTTCAAGTATCTTACCTGACACCGCAGGAC  
 A N S G A R I G L A E E I K H M F Q V A W I D P S D P Y K G F K Y L Y L T P Q D  
 TACACAGGTATCAGTCCACGGGTGTTCACTGTCGTCACGTAGAGGAAGGTGGAGGATCATCATCATCATCGGGAAGGACATGGCTCTTGGGGTTGAGAACCTTACATCGCA  
 Y T R I S S T G A V H C R H V E E G G E S R Y I I T D I I G K D D G L G V E N L  
 CGAGTCTTGGACCATCGCTGGAGATCCTCTCAGGCTACGAGGAGATTATTACAATTAGTATGGTGACGTGTCGCGCTATTGGAATCGGAGCTATCTGGTGGCTTGGGACAGAGA  
 R G S G T I A G E S S Q A Y E E I I T I S M V T C R A I G I G A Y L V R L G Q R  
 GTGATACAAGTGAAGTCTCATATTATCTGACTGGGGCAGGCGCTCTGAAGAGGTTTGGGCAGAGAGGTCTATACCTCCAACAACGAGCTGGGAGGGATCCAGATCATCACAAC  
 V I Q V E N S H I I L T G A G A L N K V L G R E V Y T S N N Q L G G I Q I M H N  
 AATGGAGTCACACACCACTGTCCAGATGACTTTGAGGCGTCTTACCATCTCCGGTGGCTCTCTATATGCCAAGAACAAATCTCCCGCTGCCTGTTATATCAACTACAGAT  
 N G V T H T T V P D D F E G V F T I L R W L S Y M P K N K Y S P V P V I S T T D  
 CCAGTCAGATCCAGCAACCTGGATTGAGATCTAAGTCTGTCAGCAGGCTGGCCAGGTGTGGTTTCCAGATTGAGCCTTAAACTGCTCAGGCCATTAGTACTCAACCGGAGCGGT  
 P A D P A N L D S E S K V L Q Q A G Q V W F P D S A F K T A Q I S D F N R E R  
 CTGCTCTCATGGTGTTCGCAACTGGAGGGGCTTCTCTGGTGAATGAAGATATGTACGATCAGATATGAAGTTTGGGGCTACATCGTGAGCGCTCGCTGGTGGTTTTCATCAGCGG  
 L P L M V F A N W R G F S G G M K D M Y D Q I L K F G A Y I V D A L R G F H Q P  
 GTGCTGGTGTATCCACCTCAGCTGAGCTAAGAGGAGCTCATGGGTGGTGATAGCCCAACCATCAACCCGTTGTGTATGGAGCTCATGACAGACAGGAGAGCAGAGGTGGTGTG  
 V L V Y I P P Q A E L R G G S W V V I D P T I N P L C M E L Y A D R E S R G G V  
 CTGGAGGCTGAGGTACAGTGGAGATCAAATCAGGAGGAAGGACCTGCTGAAGACAATGAGAAGACTTGATTGAGTTTATGCTGGCCTGGTTGAGCAGCTTGCTTCCCTAGAGCTGTCT  
 L E A E G T V E I K F R R K D L L K T M R R L D S V Y A G L V E Q L A S L E L S  
 GACAAACAGTGAAGAGCTGGAGTCAAAGCTCAAAGCGAGGGAGGAATTCCTGTGGCCATCTACCAACAGGTGGCAGTGCAGTTTGTAGAGCTCCATGACACCCAGGAAGGATGCAG  
 D K Q C K E L E S K L K A R E E F L L P I Y H Q V A V Q F V E L H D T P G R M Q  
 GAGAAGGGTGCATCACTGATATTTGGATTGGAAAAATGTGCGGACCTTCTTCTACTGGCGTCTTCGTCGCTCCTTTTGAACAAGTGGTGAAGTGTGAGATTCTGCAGGCCCAACAAG  
 E K G V I T D I L D W K N V R T F F Y W R L R R L L L E Q V V K C E I L Q A N K  
 GACCTCAGTGACGGGCACATGTCAGTCCATGCTGCGACGCTGGTTTGTGAAACAGAAGAACAGTCAAGGCTTACCTGTGGGATAATAACCAAGCAGTGTGAGTGGCTTGAGAAGCAT  
 D L S D G H M Q S M L R R W F V E T E G T V K A Y L W D N N Q A V V E W L E K H  
 TTGTCTGAAGAGGATGGCGCTCGATCTCGCATCCGAGAGAACATCAAGTACCTGAAAGGGGAAACACTTTGAAACACATCCGAGCGCTGGTGCAGGCCAACCTGACGTAGCCATGGAC  
 L S E E D G A R S A I R E N I K Y L K R E N T L K H I R S L V Q A N P D V A M D  
 TGCATCATCCACATGAGCCATAATATCACTCCATCGCAGAGGGCCAAACTCTCACATTTACTCGCAACTATGGACAGCACCAGCACCAGTTAA  
 C I I H M S H N I T P S Q R A K L S H L L A T M D S T S T S \*

**Figure S2 Nucleotide and deduced amino acid sequences of *acc2* gene. The start codon (ATG) and the stop codon (TGA) are in bold.**



|                          |                                                                   |     |
|--------------------------|-------------------------------------------------------------------|-----|
| Homo_sapiens ACC1        | ..MWWSTLMSILRARSFWKWISTQTVRIIRAVRAHFGGIMDEPS...PLACFLELNQHSR      | 55  |
| Mus_musculus ACC1        | .....MDEPS...PLAKTLELNQHSR                                        | 18  |
| Bos_taurus ACC1          | .....MDEPS...SLAKFLELNQHSR                                        | 18  |
| Capra_hircus ACC1        | ..MWWSTLMSILRASSFWKWISAQTIIRIRALRARFEGTMDDEPS...SLAKFLELNQHSR     | 55  |
| Danio_rerio ACC1         | .....MAEQDS...TEKKLPAAVAALHSH                                     | 20  |
| Sparus_aurata ACC1       | MFPWLTFFVACLTAVLGLFFWSRKQLS.IVFAACSCRPA MAQQDG...AAKKS PAAVAALHSH | 57  |
| Lates_calcarifer ACC1    | .....MAQQDG.AAAKKN PAAVAALHSH                                     | 21  |
| Oncorhynchus_mykiss ACC1 | .....MAQQDAPANKAAAPNLAVLHSH                                       | 22  |
| Larimichthys_crocea ACC1 | MFPWLTFAACLASVLGLFFWSRKQLTSIVFAACSCRPA MAQQDGAAAAKKN PAAVAALHSH   | 60  |
| Consensus                | hs                                                                |     |
| Homo_sapiens ACC1        | FIIGSVSPDNSEDEISNLVKIDILEE..KEGSLSPAS..VGSDDLSDIGISSLQDGLALH.     | 111 |
| Mus_musculus ACC1        | FIIGSVSPDNSEDEISNLVKIDILEE..KEGSLSPAS..VSSDTLSDLIGISGLQDGLAFH.    | 73  |
| Bos_taurus ACC1          | FIIGSVSPDNSEDEISNLVKIDILEE..KEGSLSPAS..VSSDTLSDLIGISSLQDGLALH.    | 74  |
| Capra_hircus ACC1        | FIIGSVSPDNSEDEISNLVKIDILEE..KEGSLSPAS..VSSDTLSDLIGISSLQDGLALH.    | 111 |
| Danio_rerio ACC1         | FIVGSVSPDNSEDEITAGKLDLQLEBN..PRSLSPSS..VSSDSTYEMGFDSLGLPHN..      | 74  |
| Sparus_aurata ACC1       | FIVGSVSPDNSEDEITQGPDPQLPEKE..TRSLSPSS..GSSDSTFEMGFHDIDGPIHN..     | 112 |
| Lates_calcarifer ACC1    | FIVGSVSPDNSEDEITQGLDVLQLEPEKE..TRSLSPSS..GSSDSTYEMGFHDIDGPMHN..   | 76  |
| Oncorhynchus_mykiss ACC1 | FIIGSVSPDNSEDEITLGLPKDITLGLLEEKERSISPTSLSSSENSSYEMGFHDIDGPHMSCS   | 82  |
| Larimichthys_crocea ACC1 | FIVGSVSPDNSEDEITQGPDPQLPEKE..NRSLSPSS..ASSDSTCEMGFDHIDGPVQN..     | 115 |
| Consensus                | f gsvse nsede l s sp s g                                          |     |
| Homo_sapiens ACC1        | IRSSMSGLHLVKQGRDRKKIDISQDFTVASPAEFVTRFGGNKVIEKVLIANNGIAAVKCM      | 171 |
| Mus_musculus ACC1        | MRSSMSGLHLVKQGRDRKKIDISQDFTVASPAEFVTRFGGNKVIEKVLIANNGIAAVKCM      | 133 |
| Bos_taurus ACC1          | MRSSMSGLHLVKQGRDRKKIDISQDFTVASPAEFVTRFGGNKVIEKVLIANNGIAAVKCM      | 134 |
| Capra_hircus ACC1        | MRSSMSGLHLVKQGRDRKKIDISQDFTVASPAEFVTRFGGNKVIEKVLIANNGIAAVKCM      | 171 |
| Danio_rerio ACC1         | MRPSMSGLHLVKQGRDRRRIDLQDFTVASPAEFVTRFGGNKVIEKVLIANNGIAAVKCM       | 134 |
| Sparus_aurata ACC1       | IRPSMSGLHLVKQGRDRRRIDLQDFTVASPAEFVTRFGGNKVIEKVLIANNGIAAVKCM       | 172 |
| Lates_calcarifer ACC1    | IRPSMSGLHLVKQGRDRRRIDLQDFTVASPAEFVTRFGGNKVIEKVLIANNGIAAVKCM       | 136 |
| Oncorhynchus_mykiss ACC1 | HRPSMSGLHLVKQGRDRRRIDLQDFTVASPAEFVTRFGGNKVIEKVLIANNGIAAVKCM       | 142 |
| Larimichthys_crocea ACC1 | IRPSMSGLHLVKQGRDRRRIDLQDFTVASPAEFVTRFGGNKVIEKVLIANNGIAAVKCM       | 175 |
| Consensus                | r smsglhlvkqgrdr id qrdftvaspaefvtrfggnkviekvlianngiaavkcm        |     |
| Homo_sapiens ACC1        | RSIRRWSEYEMFRNERAIRFVVMVTPEDLKANA EYIKMADHYVPVPGGPNNNNYANVELIL    | 231 |
| Mus_musculus ACC1        | RSIRRWSEYEMFRNERAIRFVVMVTPEDLKANA EYIKMADHYVPVPGGPNNNNYANVELIL    | 193 |
| Bos_taurus ACC1          | RSIRRWSEYEMFRNERAIRFVVMVTPEDLKANA EYIKMADHYVPVPGGPNNNNYANVELIL    | 194 |
| Capra_hircus ACC1        | RSIRRWSEYEMFRNERAIRFVVMVTPEDLKANA EYIKMADHYVPVPGGPNNNNYANVELIL    | 231 |
| Danio_rerio ACC1         | RSIRRWSEYEMFRNERAIRFVVMVTPEDLKANA EYIKMADHYVPVPGGPNNNNYANVELIL    | 194 |
| Sparus_aurata ACC1       | RSIRRWSEYEMFRNERAIRFVVMVTPEDLKANA EYIKMADHYVPVPGGPNNNNYANVELIL    | 232 |
| Lates_calcarifer ACC1    | RSIRRWSEYEMFRNERAIRFVVMVTPEDLKANA EYIKMADHYVPVPGGPNNNNYANVELIL    | 196 |
| Oncorhynchus_mykiss ACC1 | RSIRRWSEYEMFRNERAIRFVVMVTPEDLKANA EYIKMADHYVPVPGGPNNNNYANVELIL    | 202 |
| Larimichthys_crocea ACC1 | RSIRRWSEYEMFRNERAIRFVVMVTPEDLKANA EYIKMADHYVPVPGGPNNNNYANVELIL    | 235 |
| Consensus                | rsirrw yemfrnerairfvmvtpedlkanaeyikmadhyvpvpgg nnnnyanvelil       |     |
| Homo_sapiens ACC1        | DIAKRIPVQAVWAGWGHAENPKLPPELLKNGIAFMGPPSQAMWALGDKIASSIVAQTAG       | 291 |
| Mus_musculus ACC1        | DIAKRIPVQAVWAGWGHAENPKLPPELLKNGIAFMGPPSQAMWALGDKIASSIVAQTAG       | 253 |
| Bos_taurus ACC1          | DIAKRIPVQAVWAGWGHAENPKLPPELLKNGIAFMGPPSQAMWALGDKIASSIVAQTAG       | 254 |
| Capra_hircus ACC1        | DIARRIPVQAVWAGWGHAENPKLPPELLKNGIAFMGPPSQAMWALGDKIASSIVAQTAG       | 291 |
| Danio_rerio ACC1         | DIAKRIPVQAVWAGWGHAENPKLPPELLKNGIAFMGPPSQAMWALGDKIASSIVAQTAG       | 254 |
| Sparus_aurata ACC1       | DIAKRIPVQAVWAGWGHAENPKLPPELLKNGIAFMGPPSQAMWALGDKIASSIVAQTAG       | 292 |
| Lates_calcarifer ACC1    | DIAKRIPVQAVWAGWGHAENPKLPPELLKNGIAFMGPPSQAMWALGDKIASSIVAQTAG       | 256 |
| Oncorhynchus_mykiss ACC1 | DIAKRIPVQAVWAGWGHAENPKLPPELLKNGIAFMGPPSQAMWALGDKIASSIVAQTAG       | 262 |
| Larimichthys_crocea ACC1 | DIAKRIPVQAVWAGWGHAENPKLPPELLKNGIAFMGPPSQAMWALGDKIASSIVAQTAG       | 295 |
| Consensus                | dia ripqvawagwghasenpklpell k giafmgppsqamw lgdkiasivaqtag        |     |
| Homo_sapiens ACC1        | IPTLPWSCSGLRVVDQENDFSKRILNVFQELIYERKGYVKDVEDGLKAAEBVGYPVMIKASE    | 351 |
| Mus_musculus ACC1        | IPTLPWSCSGLRVVDQENDFSKRILNVFQELIYERKGYVKDVEDGLKAAEBVGYPVMIKASE    | 313 |
| Bos_taurus ACC1          | IPTLPWSCSGLRVVDQENDFSKRILNVFQELIYERKGYVKDVEDGLKAAEBVGYPVMIKASE    | 314 |
| Capra_hircus ACC1        | IPTLPWSCSGLRVVDQENDFSKRILNVFQELIYERKGYVKDVEDGLKAAEBVGYPVMIKASE    | 351 |
| Danio_rerio ACC1         | IPTLPWSCGTGLVETENDQRRKILNVFQELIYERKGYVKDVEDGLKAAEBVGYPVMIKASE     | 314 |
| Sparus_aurata ACC1       | IPTLPWSCGTGLVETENDQRRKILNVFQELIYERKGYVKDVEDGLKAAEBVGYPVMIKASE     | 352 |
| Lates_calcarifer ACC1    | IPTLPWSCGTGLVETENDQRRKILNVFQELIYERKGYVKDVEDGLKAAEBVGYPVMIKASE     | 316 |
| Oncorhynchus_mykiss ACC1 | IPTLPWSCAGLTVDTESDQRRKILNVFQELIYERKGYVKDVEDGLKAAEBVGYPVMIKASE     | 322 |
| Larimichthys_crocea ACC1 | IPTLPWSCGTGLVETENDQRRKILNVFQELIYERKGYVKDVEDGLKAAEBVGYPVMIKASE     | 355 |
| Consensus                | iptlpwsg l v w e k nvp ye g dv gl aae g p m kase                  |     |
| Homo_sapiens ACC1        | GGGGKGIRKVNADDFPNLFRQVQAEVPGSPIFVMRLAKQSRHLEVQILADQYGNATISLF      | 411 |
| Mus_musculus ACC1        | GGGGKGIRKVNADDFPNLFRQVQAEVPGSPIFVMRLAKQSRHLEVQILADQYGNATISLF      | 373 |
| Bos_taurus ACC1          | GGGGKGIRKVNADDFPNLFRQVQAEVPGSPIFVMRLAKQSRHLEVQILADQYGNATISLF      | 374 |
| Capra_hircus ACC1        | GGGGKGIRKVNADDFPNLFRQVQAEVPGSPIFVMRLAKQSRHLEVQILADQYGNATISLF      | 411 |
| Danio_rerio ACC1         | GGGGKGIRKVNADDFPNLFRQVQAEVPGSPIFVMRLAKQSRHLEVQILADQYGNATISLF      | 374 |
| Sparus_aurata ACC1       | GGGGKGIRKVNADDFPNLFRQVQAEVPGSPIFVMRLAKQSRHLEVQILADQYGNATISLF      | 412 |
| Lates_calcarifer ACC1    | GGGGKGIRKVNADDFPNLFRQVQAEVPGSPIFIMELAKQSRHLEVQILADQYGNATISLF      | 376 |
| Oncorhynchus_mykiss ACC1 | GGGGKGIRKVNADDFPNLFRQVQAEVPGSPIFVMRLAKQSRHLEVQILADQYGNATISLF      | 382 |
| Larimichthys_crocea ACC1 | GGGGKGIRKVNADDFPNLFRQVQAEVPGSPIFVMRLAKQSRHLEVQILADQYGNATISLF      | 415 |
| Consensus                | ggggkgirkvn ddpnl frqvq evpgsp f m lak rhlevq ladqygna islf       |     |
| Homo_sapiens ACC1        | GRDCSVQRRHQKIEEAPATITATPAVFHMEQCAVKLAKM/GYVSAGTVEYLYSODGSFY       | 471 |
| Mus_musculus ACC1        | GRDCSVQRRHQKIEEAPATITATPAVFHMEQCAVKLAKM/GYVSAGTVEYLYSODGSFY       | 433 |
| Bos_taurus ACC1          | GRDCSVQRRHQKIEEAPATITATPAVFHMEQCAVKLAKM/GYVSAGTVEYLYSODGSFY       | 434 |
| Capra_hircus ACC1        | GRDCSVQRRHQKIEEAPATITATPAVFHMEQCAVKLAKM/GYVSAGTVEYLYSODGSFY       | 471 |
| Danio_rerio ACC1         | GRDCSVQRRHQKIEEAPATITATPAVFHMEQCAVKLAKM/GYVSAGTVEYLYSODGSFY       | 434 |
| Sparus_aurata ACC1       | GRDCSVQRRHQKIEEAPATITATPAVFHMEQCAVKLAKM/GYVSAGTVEYLYSODGSFY       | 472 |
| Lates_calcarifer ACC1    | GRDCSVQRRHQKIEEAPATITATPAVFHMEQCAVKLAKM/GYVSAGTVEYLYSODGSFY       | 436 |
| Oncorhynchus_mykiss ACC1 | GRDCSVQRRHQKIEEAPATITATPAVFHMEQCAVKLAKM/GYVSAGTVEYLYSODGSFY       | 442 |
| Larimichthys_crocea ACC1 | GRDCSVQRRHQKIEEAPATITATPAVFHMEQCAVKLAKM/GYVSAGTVEYLYSODGSFY       | 475 |
| Consensus                | grdcsvqrrhqkieeapa i t vfe me cavkla mvgyvsagtveylysq sfy         |     |



|                          |                                                                          |     |
|--------------------------|--------------------------------------------------------------------------|-----|
| Homo_sapiens ACC1        | FLELNPRQLQVEHPCTEMVADVNLPAALQIAMIPIPIYRIKDIRMYGVSPWGLSPIDFED             | 531 |
| Mus_musculus ACC1        | FLELNPRQLQVEHPCTEMVADVNLPAALQIAMIPIPIYRIKDIRMYGVSPWGLDAPIDFEN            | 493 |
| Bos_taurus ACC1          | FLELNPRQLQVEHPCTEMVADVNLPAALQIAMIPIPIYRIKDIRMYGVSPWGLDAPIDFEN            | 494 |
| Capra_hircus ACC1        | FLELNPRQLQVEHPCTEMVADVNLPAALQIAMIPIPIYRIKDIRMYGVSPWGLDAPIDFEN            | 531 |
| Danio_rerio ACC1         | FLELNPRQLQVEHPCTEMVADVNLPAALQIAMIPIPIYRIKDIRVLYGMCPWGLSPIDFEDG           | 494 |
| Sparus_aurata ACC1       | FLELNPRQLQVEHPCTEMVADVNLPAALQIAMIPIPIYRIKDIRMLYGVCPWGLSPIDFEDG           | 532 |
| Lates_calcarifer ACC1    | FLELNPRQLQVEHPCTEMVADVNLPAALQIAMIPIPIYRIKDIRMLYGVCPWGLSPIDFEDG           | 496 |
| Oncorhynchus_mykiss ACC1 | FLELNPRQLQVEHPCTEMVADVNLPAALQIAMIPIPIYRIKDIRMYGVCPWGLSPIDFEDG            | 502 |
| Larimichthys_crocea ACC1 | FLELNPRQLQVEHPCTEMVADVNLPAALQIAMIPIPIYRIKDIRMLYGVCPWGLSPIDFEDG           | 535 |
| Consensus                | flelnprqlqvehpctemvadvnlpaalqiamgipl rikdir yg pwgd idf                  |     |
| Homo_sapiens ACC1        | SAHVFCPRGHVIAARITSENPDGFKPSSSGTVQELNFRSNKNVWGYFSVAAAGGLHEFAD             | 591 |
| Mus_musculus ACC1        | SAHVFCPRGHVIAARITSENPDGFKPSSSGTVQELNFRSNKNVWGYFSVAAAGGLHEFAD             | 553 |
| Bos_taurus ACC1          | SAHVFCPRGHVIAARITSENPDGFKPSSSGTVQELNFRSNKNVWGYFSVAAAGGLHEFAD             | 554 |
| Capra_hircus ACC1        | SAHVFCPRGHVIAARITSENPDGFKPSSSGTVQELNFRSNKNVWGYFSVAAAGGLHEFAD             | 591 |
| Danio_rerio ACC1         | LSTTECPRGHVIAARITSENPDGFKPSSSGTVQELNFRSNKNVWGYFSVAAAGGLHEFAD             | 554 |
| Sparus_aurata ACC1       | LSTAESPRGHVIAARITSENPDGFKPSSSGTVQELNFRSNKNVWGYFSVAAAGGLHEFAD             | 592 |
| Lates_calcarifer ACC1    | LSTAESPRGHVIAARITSENPDGFKPSSSGTVQELNFRSNKNVWGYFSVAAAGGLHEFAD             | 556 |
| Oncorhynchus_mykiss ACC1 | LSTAESPRGHVIAARITSENPDGFKPSSSGTVQELNFRSNKNVWGYFSVAAAGGLHEFAD             | 562 |
| Larimichthys_crocea ACC1 | LSTAESPRGHVIAARITSENPDGFKPSSSGTVQELNFRSNKNVWGYFSVAAAGGLHEFAD             | 595 |
| Consensus                | p prghviaaritsenpdgfkpsssgtvqelnfrsnknvwgyfsvaaagglhefad                 |     |
| Homo_sapiens ACC1        | SQFGHCFWSWGENREEAISNMVVALKELSIKIRGDFRTTVEYLIKLETESFQHNIDITGWLD           | 651 |
| Mus_musculus ACC1        | SQFGHCFWSWGENREEAISNMVVALKELSIKIRGDFRTTVEYLIKLETESFQHNIDITGWLD           | 613 |
| Bos_taurus ACC1          | SQFGHCFWSWGENREEAISNMVVALKELSIKIRGDFRTTVEYLIKLETESFQHNIDITGWLD           | 614 |
| Capra_hircus ACC1        | SQFGHCFWSWGENREEAISNMVVALKELSIKIRGDFRTTVEYLIKLETESFQHNIDITGWLD           | 651 |
| Danio_rerio ACC1         | SQFGHCFWSWGENREEAISNMVVALKELSIKIRGDFRTTVEYLIKLETESFQHNIDITGWLD           | 614 |
| Sparus_aurata ACC1       | SQFGHCFWSWGENREEAISNMVVALKELSIKIRGDFRTTVEYLIKLETESFQHNIDITGWLD           | 652 |
| Lates_calcarifer ACC1    | SQFGHCFWSWGENREEAISNMVVALKELSIKIRGDFRTTVEYLIKLETESFQHNIDITGWLD           | 616 |
| Oncorhynchus_mykiss ACC1 | SQFGHCFWSWGENREEAISNMVVALKELSIKIRGDFRTTVEYLIKLETESFQHNIDITGWLD           | 622 |
| Larimichthys_crocea ACC1 | SQFGHCFWSWGENREEAISNMVVALKELSIKIRGDFRTTVEYLIKLETESFQHNIDITGWLD           | 655 |
| Consensus                | sqfghcfswgenreeaisnmvvalkelsirgdftrttveylikletesfq n i tgwld             |     |
| Homo_sapiens ACC1        | RLIAEKVQAEPRDTMLGVVCGALHVADVSLRNSVSNFLHSLERGQVLPAAHTLLNTVDVEL            | 711 |
| Mus_musculus ACC1        | RLIAEKVQAEPRDTMLGVVCGALHVADVSLRNSISNFLHSLERGQVLPAAHTLLNTVDVEL            | 673 |
| Bos_taurus ACC1          | RLIAEKVQAEPRDTMLGVVCGALHVADVSLRNSISNFLHSLERGQVLPAAHTLLNTVDVEL            | 674 |
| Capra_hircus ACC1        | RLIAEKVQAEPRDTMLGVVCGALHVADVSLRNSISNFLHSLERGQVLPAAHTLLNTVDVEL            | 711 |
| Danio_rerio ACC1         | RLIAEKVQAEPRDTMLGVVCGALHVADVSLRNSISNFLHSLERGQVLPAAHTLLNTVDVEL            | 674 |
| Sparus_aurata ACC1       | RLIAEKVQAEPRDTMLGVVCGALHVADVSLRNSVSNFLHSLERGQVLPAAHTLLNTVDVEL            | 712 |
| Lates_calcarifer ACC1    | RLIAEKVQAEPRDTMLGVVCGALHVADVSLRNSVSNFLHSLERGQVLPAAHTLLNTVDVEL            | 676 |
| Oncorhynchus_mykiss ACC1 | RLIAEKVQAEPRDTMLGVVCGALHVADVSLRNSVSNFLHSLERGQVLPAAHTLLNTVDVEL            | 682 |
| Larimichthys_crocea ACC1 | RLIAEKVQAEPRDTMLGVVCGALHVADVSLRNSVSNFLHSLERGQVLPAAHTLLNTVDVEL            | 715 |
| Consensus                | rli ek qaerpdtmlg v galhvadv slrns snflhslergqvl ahtllntvdvel            |     |
| Homo_sapiens ACC1        | IYEGKYVYLVKVTQSPNSYVYVIMNCSAEVDVHRLSDGGLLLSYDGSSYTTYMKKEVDRY             | 771 |
| Mus_musculus ACC1        | IYEGKYVYLVKVTQSPNSYVYVIMNCSAEVDVHRLSDGGLLLSYDGSSYTTYMKKEVDRY             | 733 |
| Bos_taurus ACC1          | IYEGKYVYLVKVTQSPNSYVYVIMNCSAEVDVHRLSDGGLLLSYDGSSYTTYMKKEVDRY             | 734 |
| Capra_hircus ACC1        | IYEGKYVYLVKVTQSPNSYVYVIMNCSAEVDVHRLSDGGLLLSYDGSSYTTYMKKEVDRY             | 771 |
| Danio_rerio ACC1         | IYEGKYVYLVKVTQSPNSYVYVIMNCSAEVDVHRLSDGGLLLSYDGSSYTTYMKKEVDRY             | 734 |
| Sparus_aurata ACC1       | IYEGKYVYLVKVTQSPNSYVYVIMNCSAEVDVHRLSDGGLLLSYDGSSYTTYMKKEVDRY             | 772 |
| Lates_calcarifer ACC1    | IYEGKYVYLVKVTQSPNSYVYVIMNCSAEVDVHRLSDGGLLLSYDGSSYTTYMKKEVDRY             | 736 |
| Oncorhynchus_mykiss ACC1 | IYEGKYVYLVKVTQSPNSYVYVIMNSTAAEVDVHRLSDGGLLLSYDGSSYTTYMKKEVDRY            | 742 |
| Larimichthys_crocea ACC1 | IYEGKYVYLVKVTQSPNSYVYVIMNCSAEVDVHRLSDGGLLLSYDGSSYTTYMKKEVDRY             | 775 |
| Consensus                | iyeg ky l vtrqspnsyvvimn saevdvhrlsdgglllsydgssy t t y m k k e e v d r y |     |
| Homo_sapiens ACC1        | RITIGNKTCVFEKENDPSVLRSPSAGKLIQYIVEDGGHVFAQCQYAEIEVMKMVMTLTAV             | 831 |
| Mus_musculus ACC1        | RITIGNKTCVFEKENDPSVLRSPSAGKLIQYIVEDGGHVFAQCQYAEIEVMKMVMTLTAV             | 793 |
| Bos_taurus ACC1          | RITIGNKTCVFEKENDPSVLRSPSAGKLIQYIVEDGGHVFAQCQYAEIEVMKMVMTLTAA             | 794 |
| Capra_hircus ACC1        | RITIGNKTCVFEKENDPSVLRSPSAGKLIQYIVEDGGHVFAQCQYAEIEVMKMVMTLTAA             | 831 |
| Danio_rerio ACC1         | RITIGNKTCVFEKENDPSVLRSPSAGKLIQYIVEDGGHVFAQCQYAEIEVMKMVMTLTAS             | 794 |
| Sparus_aurata ACC1       | RITIGNKTCVFEKENDPSVLRSPSAGKLIQYIVEDGGHVFAQCQYAEIEVMKMVMTLTAA             | 832 |
| Lates_calcarifer ACC1    | RITIGNKTCVFEKENDPSVLRSPSAGKLIQYIVEDGGHVFAQCQYAEIEVMKMVMTLTAA             | 796 |
| Oncorhynchus_mykiss ACC1 | RITIGNKTCVFEKENDPSVLRSPSAGKLIQYIVEDGGHVFAQCQYAEIEVMKMVMTLTAL             | 802 |
| Larimichthys_crocea ACC1 | RITIGNKTCVFEKENDPSVLRSPSAGKLIQYIVEDGGHVFAQCQYAEIEVMKMVMTLTAA             | 835 |
| Consensus                | ri ignkctcvfe endps rpsagk iqy vedgghvf gqcyaievmkmvmtlta                |     |
| Homo_sapiens ACC1        | ESGCIHYVKRGAALDPGCVIAKMLDNPSPKVVQQAELHTGSLERIQSTALRGEKLRHVHF             | 891 |
| Mus_musculus ACC1        | ESGCIHYVKRGAALDPGCVIAKMLDNPSPKVVQQAELHTGSLERIQSTALRGEKLRHVHF             | 853 |
| Bos_taurus ACC1          | ESGCIHYVKRGAALDPGCVIAKMLDNPSPKVVQQAELHTGSLERIQSTALRGEKLRHVHF             | 854 |
| Capra_hircus ACC1        | ESGCIHYVKRGAALDPGCVIAKMLDNPSPKVVQQAELHTGSLERIQSTALRGEKLRHVHF             | 891 |
| Danio_rerio ACC1         | ESGCIHYVKRGAALDPGCVIAKMLDNPSPKVVQQAELHTGSLERIQSTALRGEKLRHVHF             | 854 |
| Sparus_aurata ACC1       | ESGCIHYVKRGAALDPGCVIAKMLDNPSPKVVQQAELHTGSLERIQSTALRGEKLRHVHF             | 892 |
| Lates_calcarifer ACC1    | ESGCIHYVKRGAALDPGCVIAKMLDNPSPKVVQQAELHTGSLERIQSTALRGEKLRHVHF             | 856 |
| Oncorhynchus_mykiss ACC1 | VSGCIHYVKRGAALDPGCVIAKMLDNPSPKVVQQAELHTGSLERIQSTALRGEKLRHVHF             | 862 |
| Larimichthys_crocea ACC1 | ESGCIHYVKRGAALDPGCVIAKMLDNPSPKVVQQAELHTGSLERIQSTALRGEKLRHVHF             | 895 |
| Consensus                | sgcihyvkr ga l pgc k qld p vqqael g lp iq alrgeklhrvfh                   |     |
| Homo_sapiens ACC1        | YVLDNLVNMNGYCLPDPFFSSRVKDWVERLMKTLRDPSPLELQDINTSVSGRIPENV                | 951 |
| Mus_musculus ACC1        | YVLDNLVNMNGYCLPDPFFSSRVKDWVERLMKTLRDPSPLELQDINTSVSGRIPENV                | 913 |
| Bos_taurus ACC1          | YVLDNLVNMNGYCLPDPFFSSRVKDWVERLMKTLRDPSPLELQDINTSVSGRIPENV                | 914 |
| Capra_hircus ACC1        | YVLDNLVNMNGYCLPDPFFSSRVKDWVERLMKTLRDPSPLELQDINTSVSGRIPENV                | 951 |
| Danio_rerio ACC1         | STLDHLVHIMNGYCLPDPFFSAKLKEWVERLMKTLRDPSPLELQDINTSVSGRIPPAV               | 914 |
| Sparus_aurata ACC1       | NTLDHLVHIMNGYCLPDPFFSAKLKEWVERLMKTLRDPSPLELQDINTSVSGRIPPAV               | 952 |
| Lates_calcarifer ACC1    | NTLDHLVHIMNGYCLPDPFFSAKLKEWVERLMKTLRDPSPLELQDINTSVSGRIPPAV               | 916 |
| Oncorhynchus_mykiss ACC1 | STLDHLVHIMNGYCLPDPFFSAKLKEWVERLMKTLRDPSPLELQDINTSVSGRIPPAV               | 922 |
| Larimichthys_crocea ACC1 | NTLDHLVHIMNGYCLPDPFFSAKLKEWVERLMKTLRDPSPLELQDINTSVSGRIPPAV               | 955 |
| Consensus                | l lv m g clp pffs k wverlmkt rdp spllelq dints vsgrip v                  |     |



|                          |                                                                   |      |
|--------------------------|-------------------------------------------------------------------|------|
| Homo_sapiens ACC1        | EKSIKKEMAQYASNITSVLQCFPSQIQIANILDSHAATLNKKSEREVFFMNTQSIVQLVQR     | 1011 |
| Mus_musculus ACC1        | EKSIKKEMAQYASNITSVLQCFPSQIQIANILDSHAATLNKKSEREVFFMNTQSIVQLVQR     | 973  |
| Bos_taurus ACC1          | EKSIKKEMAQYASNITSVLQCFPSQIQIANILDSHAATLNKKSEREVFFMNTQSIVQLVQR     | 974  |
| Capra_hircus ACC1        | EKSIKKEMAQYASNITSVLQCFPSQIQIANILDSHAATLNKKSEREVFFMNTQSIVQLVQR     | 1011 |
| Danio_rerio ACC1         | EKAIKKEMAQYASNITSVLQCFPSQIQIANILDSHAATLNKKSEREVFFMNTQSIVQLVQR     | 974  |
| Sparus_aurata ACC1       | EKAIKKEMAQYASNITSVLQCFPSQIQIANILDSHAATLNKKSEREVFFMNTQSIVQLVQR     | 1012 |
| Lates_calcarifer ACC1    | EKAIKKEMAQYASNITSVLQCFPSQIQIANILDSHAATLNKKSEREVFFMNTQSIVQLVQR     | 976  |
| Oncorhynchus_mykiss ACC1 | EKAIKKEMAQYASNITSVLQCFPSQIQIANILDSHAATLNKKSEREVFFMNTQSIVQLVQR     | 982  |
| Larimichthys_crocea ACC1 | EKAIKKEMAQYASNITSVLQCFPSQIQIANILDSHAATLNKKSEREVFFMNTQSIVQLVQR     | 1015 |
| Consensus                | ek ikkemaqyasnitsvlcqfpsqqianildshaatl n kserevffmntqsiqlvq       |      |
| Homo_sapiens ACC1        | YRSGIRGHMKAVVMDLLRQYLRVETQFQNGHYDKCVFALREENKSDMNTVLNYIFSHAQV      | 1071 |
| Mus_musculus ACC1        | YRSGIRGHMKAVVMDLLRQYLRVETQFQNGHYDKCVFALREENKSDMNTVLNYIFSHAQV      | 1033 |
| Bos_taurus ACC1          | YRSGIRGHMKAVVMDLLRQYLRVETQFQNGHYDKCVFALREENKSDMNTVLNYIFSHAQV      | 1034 |
| Capra_hircus ACC1        | YRSGIRGHMKAVVMDLLRQYLRVETQFQNGHYDKCVFALREENKSDMNTVLNYIFSHAQV      | 1071 |
| Danio_rerio ACC1         | YRSGIRGHMKAVVMDLLRQYLRVETQFQNGHYDKCVFALREENKSDMANVLNYIFSHAQV      | 1034 |
| Sparus_aurata ACC1       | YRSGIRGHMKAVVMDLLRQYLRVETQFQNGHYDKCVFALREENKSDMANVLNYIFSHAQV      | 1072 |
| Lates_calcarifer ACC1    | YRSGIRGHMKAVVMDLLRQYLRVETQFQNGHYDKCVFALREENKSDMANVLNYIFSHAQV      | 1036 |
| Oncorhynchus_mykiss ACC1 | YRSGIRGHMKAVVMDLLRQYLRVETQFQNGHYDKCVFALREENKSDMANVLNYIFSHAQV      | 1042 |
| Larimichthys_crocea ACC1 | YRSGIRGHMKAVVMDLLRQYLRVETQFQNGHYDKCVFALREENKSDMANVLNYIFSHAQV      | 1075 |
| Consensus                | yrsgirghmkavvmdllrqyl ve qfq ghy kcvf lreenk dm vlnyifshaqv       |      |
| Homo_sapiens ACC1        | TKKNLLVTMLIDQLCGRDPTLTDELINILTELTQLSKTTNAKVALRARQVLIASHLPSYE      | 1131 |
| Mus_musculus ACC1        | TKKNLLVTMLIDQLCGRDPTLTDELINILTELTQLSKTTNAKVALRARQVLIASHLPSYE      | 1093 |
| Bos_taurus ACC1          | TKKNLLVTMLIDQLCGRDPTLTDELINILTELTQLSKTTNAKVALRARQVLIASHLPSYE      | 1094 |
| Capra_hircus ACC1        | TKKNLLVTMLIDQLCGRDPTLTDELINILTELTQLSKTTNAKVALRARQVLIASHLPSYE      | 1131 |
| Danio_rerio ACC1         | TKKNLLVTMLIDQLCGRDPTLTDELINILTELTQLSKTTNAKVALRARQVLIASHLPSYE      | 1094 |
| Sparus_aurata ACC1       | TKKNLLVTMLIDQLCGRDPTLTDELINILTELTQLSKTTNAKVALRARQVLIASHLPSYE      | 1132 |
| Lates_calcarifer ACC1    | TKKNLLVTMLIDQLCGRDPTLTDELINILTELTQLSKTTNAKVALRARQVLIASHLPSYE      | 1096 |
| Oncorhynchus_mykiss ACC1 | TKKNLLVTMLIDQLCGRDPTLTDELINILTELTQLSKTTNAKVALRARQVLIASHLPSYE      | 1102 |
| Larimichthys_crocea ACC1 | TKKNLLVTMLIDQLCGRDPTLTDELINILTELTQLSKTTNAKVALRARQVLIASHLPSYE      | 1135 |
| Consensus                | t kn lvtmlidqlcgr ptlt del iteltqlskttnakvalrarqqliashlpsye       |      |
| Homo_sapiens ACC1        | LRHNQVESIFLSAIDMYGHQFCIENLQKLILSETSIFDVLNPNFFYHSNQVVRMAALEVYV     | 1191 |
| Mus_musculus ACC1        | LRHNQVESIFLSAIDMYGHQFCIENLQKLILSETSIFDVLNPNFFYHSNQVVRMAALEVYV     | 1153 |
| Bos_taurus ACC1          | LRHNQVESIFLSAIDMYGHQFCIENLQKLILSETSIFDVLNPNFFYHSNQVVRMAALEVYV     | 1154 |
| Capra_hircus ACC1        | LRHNQVESIFLSAIDMYGHQFCIENLQKLILSETSIFDVLNPNFFYHSNQVVRMAALEVYV     | 1191 |
| Danio_rerio ACC1         | LRHNQVESIFLSAIDMYGHQFCIENLQKLILSETSIFDVLNPNFFYHSNQVVRMAALEVYV     | 1154 |
| Sparus_aurata ACC1       | LRHNQVESIFLSAIDMYGHQFCIENLQKLILSETSIFDVLNPNFFYHSNQVVRMAALEVYV     | 1192 |
| Lates_calcarifer ACC1    | LRHNQVESIFLSAIDMYGHQFCIENLQKLILSETSIFDVLNPNFFYHSNQVVRMAALEVYV     | 1156 |
| Oncorhynchus_mykiss ACC1 | LRHNQVESIFLSAIDMYGHQFCIENLQKLILSETSIFDVLNPNFFYHSNQVVRMAALEVYV     | 1162 |
| Larimichthys_crocea ACC1 | LRHNQVESIFLSAIDMYGHQFCIENLQKLILSETSIFDVLNPNFFYHSNQVVRMAALEVYV     | 1195 |
| Consensus                | lr nqvesiflsaidmyghqfcienlqklilsetsifdvlpnffyhdsnqvvrmaalevyv     |      |
| Homo_sapiens ACC1        | RRAYIAYELNSVQHRQLKDNTOVEFQFMLPTSHPNRGNIPTLN.....                  | 1235 |
| Mus_musculus ACC1        | RRAYIAYELNSVQHRQLKDNTOVEFQFMLPTSHPNRGNIPTLN.....                  | 1197 |
| Bos_taurus ACC1          | RRAYIAYELNSVQHRQLKDNTOVEFQFMLPTSHPNRGNIPTLN.....                  | 1198 |
| Capra_hircus ACC1        | RRAYIAYELNSVQHRQLKDNTOVEFQFMLPTSHPNRGNIPTLN.....                  | 1235 |
| Danio_rerio ACC1         | RRAYIAYELNSVQHRQLKDNTOVEFQFMLPTSHPNRGNIPTLN.....                  | 1204 |
| Sparus_aurata ACC1       | RRAYIAYELNSVQHRQLKDNTOVEFQFMLPTSHPNRGNIPTLN.....                  | 1236 |
| Lates_calcarifer ACC1    | RRAYIAYELNSVQHRQLKDNTOVEFQFMLPTSHPNRGNIPTLN.....                  | 1200 |
| Oncorhynchus_mykiss ACC1 | RRAYIAYELNSVQHRQLKDNTOVEFQFMLPTSHPNRGNIPTLN.....                  | 1206 |
| Larimichthys_crocea ACC1 | RRAYIAYELNSVQHRQLKDNTOVEFQFMLPTSHPNRGNIPTLN.....                  | 1255 |
| Consensus                | rrayiayelnsqvhrql dntc vefqfmlptshpnrgniptln                      |      |
| Homo_sapiens ACC1        | .....RMSFSSNLNHYGMVHVASVSDVLLDN                                   | 1261 |
| Mus_musculus ACC1        | .....RMSFSSNLNHYGMVHVASVSDVLLDN                                   | 1223 |
| Bos_taurus ACC1          | .....RMSFSSNLNHYGMVHVASVSDVLLDN                                   | 1224 |
| Capra_hircus ACC1        | .....RMSFSSNLNHYGMVHVASVSDVLLDN                                   | 1261 |
| Danio_rerio ACC1         | .....IQDYKPPANTANTSGATEAASDAESED.....RMSFSSNLNHYGMVHVASVSDVLLDT   | 1258 |
| Sparus_aurata ACC1       | .....RMSFSSNLNHYGMVHVASVSDVLLDT                                   | 1262 |
| Lates_calcarifer ACC1    | .....RMSFSSNLNHYGMVHVASVSDVLLDT                                   | 1226 |
| Oncorhynchus_mykiss ACC1 | .....RMSFSSNLNHYGMVHVASVSDVLLDT                                   | 1232 |
| Larimichthys_crocea ACC1 | KFQETKPDQLNAQASKSKDDNAEKRNGSDSETVD.....RMSFSSNLNHYGMVHVASVSDVLLDT | 1315 |
| Consensus                | rmsf snlnhygm h svsdvlld                                          |      |
| Homo_sapiens ACC1        | SFTPPCQRMGMVSFRIFEDFVRI FDEVMGCBS DSPPSPTFPPEAGHTSLYDED...KVPR    | 1319 |
| Mus_musculus ACC1        | AFTPPCQRMGMVSFRIFEDFVRI FDEVMGCBS DSPPSPTFPPEAGHTSLYDED...KVPR    | 1281 |
| Bos_taurus ACC1          | AFTPPCQRMGMVSFRIFEDFVRI FDEVMGCBS DSPPSPTFPPEAGHTSLYDED...KVPR    | 1282 |
| Capra_hircus ACC1        | AFTPPCQRMGMVSFRIFEDFVRI FDEVMGCBS DSPPSPTFPPEAGHTSLYDED...KVPR    | 1319 |
| Danio_rerio ACC1         | SFTPPCQRMGMVSFRISFQBFTRNIKDVLSCBS DSPPESTPTFPPECGNPVLYGEEDNKSQV   | 1318 |
| Sparus_aurata ACC1       | SFTPPCQRMGMVSFRISFQBFTRNIKDVLSCBS DSPPESTPTFPPECGNPVLYGEEDNKSQV   | 1322 |
| Lates_calcarifer ACC1    | SFTPPCQRMGMVSFRISFQBFTRNIKDVLSCBS DSPPESTPTFPPECGNPVLYGEEDNKSQV   | 1286 |
| Oncorhynchus_mykiss ACC1 | SFTPPCQRMGMVSFRISFQBFTRNIKDVLSCBS DSPPESTPTFPPECGNPVLYGEEDNKSQV   | 1292 |
| Larimichthys_crocea ACC1 | SFTPPCQRMGMVSFRISFQBFTRNIKDVLSCBS DSPPESTPTFPPECGNPVLYGEEDNKSQV   | 1375 |
| Consensus                | ftppcqrmg mv fr f f r cf dssp ptfpe g ly e k                      |      |
| Homo_sapiens ACC1        | DEPIHILNVAIKTDGDIEDDLAAMFREFTQONKATLVEHGIRRLTFLVAQKDFRKQVNY       | 1379 |
| Mus_musculus ACC1        | DEPIHILNVAIKTDGDIEDDLAAMFREFTQONKATLVEHGIRRLTFLVAQKDFRKQVNC       | 1341 |
| Bos_taurus ACC1          | DEPIHILNVAIKTDGDIEDDLAAMFREFTQONKATLVEHGIRRLTFLVAQKDFRKQVNY       | 1342 |
| Capra_hircus ACC1        | DEPIHILNVAIKTDGDIEDDLAAMFREFTQONKATLVEHGIRRLTFLVAQKDFRKQVNY       | 1379 |
| Danio_rerio ACC1         | DEPIHILNVAIKTDSIDDDGLAAMFREFTQSKKSLLDHGGIRRLTFLVAQKDFRKQINC       | 1378 |
| Sparus_aurata ACC1       | DEPIHILNVAIKTDSIDDDGLAAMFREFTQSKKSLLDHGGIRRLTFLVAQKDFRKQVNC       | 1382 |
| Lates_calcarifer ACC1    | DEPIHILNVAIKTDSIDDDGLAAMFREFTQSKKSLLDHGGIRRLTFLVAQKDFRKQVNC       | 1346 |
| Oncorhynchus_mykiss ACC1 | DEPVHILNVAIKTDGDIEDDLAAMFREFTQSKKSLLDHGGIRRLTFLVAQKDFRKQVNY       | 1352 |
| Larimichthys_crocea ACC1 | DEPIHILNVAIKTDSIDDDGLAAMFREFTQSKKSLLDHGGIRRLTFLVAQKDFRKQVNC       | 1435 |
| Consensus                | dep hilnvaiktd di dd laa fr ftq k l hgirrltflvaqkdfrk n           |      |



|                          |                                                                  |      |
|--------------------------|------------------------------------------------------------------|------|
| Homo_sapiens ACC1        | EVDQRFHREFPKFFTFRRDKFEEDRIYRHLEPALAFQLELNMRNFDLTAIPCANHKMH       | 1439 |
| Mus_musculus ACC1        | EVDQRFHREFPKFFTFRRDKFEEDRIYRHLEPALAFQLELNMRNFDLTAIPCANHKMH       | 1401 |
| Bos_taurus ACC1          | EVDQRFHREFPKFFTFRRDKFEEDRIYRHLEPALAFQLELNMRNFDLTAIPCANHKMH       | 1402 |
| Capra_hircus ACC1        | EVDQRFHREFPKFFTFRRDKFEEDRIYRHLEPALAFQLELNMRNFDLTAIPCANHKMH       | 1439 |
| Danio_rerio ACC1         | EVDQRFHREFPKFFTFRRDKFEEDRIYRHLEPALAFQLELNMRNFALTAIPCANHKMH       | 1438 |
| Sparus_aurata ACC1       | EVDQRFHREFPKFFTFRRDKFEEDRIYRHLEPALAFQLELNMRNFALTAIPCANHKMH       | 1442 |
| Lates_calcarifer ACC1    | EVDQRFHREFPKFFTFRRDKFEEDRIYRHLEPALAFQLELNMRNFALTAIPCANHKMH       | 1406 |
| Oncorhynchus_mykiss ACC1 | EVDQRFHREFPKFFTFRRDKFEEDRIYRHLEPALAFQLELNMRNFALTAIPCANHKMH       | 1412 |
| Larimichthys_crocea ACC1 | EVDQRFHREFPKFFTFRRDKFEEDRIYRHLEPALAFQLELNMRNFALTAIPCANHKMH       | 1495 |
| Consensus                | evd rfhrefpkfftfrrdkfeedriyrhlepalafqlelnmrnf ltaipcanhkmh       |      |
| Homo_sapiens ACC1        | LYLGAARVEVGTEVTDYRFFVRAIIRHSDLVTKASFEYIHNBAERLLEAMDELEVAFN       | 1499 |
| Mus_musculus ACC1        | LYLGAARVEVGTEVTDYRFFVRAIIRHSDLVTKASFEYIHNBAERLLEAMDELEVAFN       | 1461 |
| Bos_taurus ACC1          | LYLGAARVEVGTEVTDYRFFVRAIIRHSDLVTKASFEYIHNBAERLLEAMDELEVAFN       | 1462 |
| Capra_hircus ACC1        | LYLGAARVEVGTEVTDYRFFVRAIIRHSDLVTKASFEYIHNBAERLLEAMDELEVAFN       | 1499 |
| Danio_rerio ACC1         | LYLGAARVEVGTEVTDYRFFVRAIIRHSDLVTKASFEYIHNBAERLLEAMDELEVAFN       | 1498 |
| Sparus_aurata ACC1       | LYLGAARVEVGTEVTDYRFFVRAIIRHSDLVTKASFEYIHNBAERLLEAMDELEVAFN       | 1502 |
| Lates_calcarifer ACC1    | LYLGAARVEVGTEVTDYRFFVRAIIRHSDLVTKASFEYIHNBAERLLEAMDELEVAFN       | 1466 |
| Oncorhynchus_mykiss ACC1 | LYLGAARVEVGTEVTDYRFFVRAIIRHSDLVTKASFEYIHNBAERLLEAMDELEVAFN       | 1472 |
| Larimichthys_crocea ACC1 | LYLGAARVEVGTEVTDYRFFVRAIIRHSDLVTKASFEYIHNBAERLLEAMDELEVAFN       | 1555 |
| Consensus                | lylgaa vevgtevtdyrffvrairrhdsdlvtkeasfeyl ne erllleamdelevafn    |      |
| Homo_sapiens ACC1        | NTNVRTDCNHIFLNFVPTVIMDPSK.....                                   | 1524 |
| Mus_musculus ACC1        | NTNVRTDCNHIFLNFVPTVIMDPSK.....                                   | 1486 |
| Bos_taurus ACC1          | NTNVRTDCNHIFLNFVPTVIMDPSK.....                                   | 1487 |
| Capra_hircus ACC1        | NTNVRTDCNHIFLNFVPTVIMDPSK.....                                   | 1524 |
| Danio_rerio ACC1         | NTTVRTDCNHIFLNFVPTVIMDPSKHSAPISIQITILKTTLAEMQPPQTRTNQRLQHVSLKA   | 1558 |
| Sparus_aurata ACC1       | NTTVRTDCNHIFLNFVPTVIMDPSK.....                                   | 1527 |
| Lates_calcarifer ACC1    | NTTVRTDCNHIFLNFVPTVIMDPSK.....                                   | 1491 |
| Oncorhynchus_mykiss ACC1 | NTTVRTDCNHIFLNFVPTVIMDPSK.....                                   | 1497 |
| Larimichthys_crocea ACC1 | NTTVRTDCNHIFLNFVPTVIMDPSK.....                                   | 1580 |
| Consensus                | nt vrtcdcnhiflnfvptvimdpsk                                       |      |
| Homo_sapiens ACC1        | IEESVSRMVMRYGSRLWKLRLVLAELKINIRLTPTGKAIPIRLFLTNEGGYLLDISLYKE     | 1584 |
| Mus_musculus ACC1        | IEESVSRMVMRYGSRLWKLRLVLAELKINIRLTPTGKAIPIRLFLTNEGGYLLDISLYKE     | 1546 |
| Bos_taurus ACC1          | IEESVSRMVMRYGSRLWKLRLVLAELKINIRLTPTGKAIPIRLFLTNEGGYLLDISLYKE     | 1547 |
| Capra_hircus ACC1        | IEESVSRMVMRYGSRLWKLRLVLAELKINIRLTPTGKAIPIRLFLTNEGGYLLDISLYKE     | 1584 |
| Danio_rerio ACC1         | IEESVSRMVMRYGSRLWKLRLVLAELKINIRLTPTGKQIPIRLFLTNEGGYLLDISLYKE     | 1618 |
| Sparus_aurata ACC1       | IEESVSRMVMRYGSRLWKLRLVLAELKINIRLTPTGKQIPIRLFLTNEGGYLLDISLYKE     | 1587 |
| Lates_calcarifer ACC1    | IEESVSRMVMRYGSRLWKLRLVLAELKINIRLTPTGKQIPIRLFLTNEGGYLLDISLYKE     | 1551 |
| Oncorhynchus_mykiss ACC1 | IEESVSRMVMRYGSRLWKLRLVLAELKINIRLTPTGKQIPIRLFLTNEGGYLLDISLYKE     | 1557 |
| Larimichthys_crocea ACC1 | IEESVSRMVMRYGSRLWKLRLVLAELKINIRLTPTGKQIPIRLFLTNEGGYLLDISLYKE     | 1640 |
| Consensus                | ieesvrsrmvmrygsrlwklrlvlqaelkinirilt tgc ipirflftnesgyylldislyke |      |
| Homo_sapiens ACC1        | VTDSRT.....AQIMFQAYGDKQGPLHGMLINTPYVTKDLLQSKRFQAQSLGTTYIYD       | 1637 |
| Mus_musculus ACC1        | VTDSRT.....AQIMFQAYGDKQGPLHGMLINTPYVTKDLLQSKRFQAQSLGTTYIYD       | 1599 |
| Bos_taurus ACC1          | VTDSRT.....AQIMFQAYGDKQGPLHGMLINTPYVTKDLLQSKRFQAQSLGTTYIYD       | 1600 |
| Capra_hircus ACC1        | VTDSRT.....AQIMFQAYGDKQGPLHGMLINTPYVTKDLLQSKRFQAQSLGTTYIYD       | 1637 |
| Danio_rerio ACC1         | VTDSRTGQVGHKDRQIMFQAYGDKQGPLHGMLINTPYVTKDLLQSKRFQAQSLGTTYIYD     | 1678 |
| Sparus_aurata ACC1       | VTDSRTGQVGPKDRQIMFQAYGDKQGPLHGMLINTPYVTKDLLQSKRFQAQSLGTTYIYD     | 1647 |
| Lates_calcarifer ACC1    | VTDSRTGQVGPKDRQIMFQAYGDKQGPLHGMLINTPYVTKDLLQSKRFQAQSLGTTYIYD     | 1611 |
| Oncorhynchus_mykiss ACC1 | VTDSRTGQVGPKDRQIMFQAYGDKQGPLHGMLINTPYVTKDLLQSKRFQAQSLGTTYIYD     | 1617 |
| Larimichthys_crocea ACC1 | VTDSRTGQVGPKDRQIMFQAYGDKQGPLHGMLINTPYVTKDLLQSKRFQAQSLGTTYIYD     | 1700 |
| Consensus                | vtdsrt qimfqaygd qgplhgmlintpyvtkd lqskrfqaqslgtty yd            |      |
| Homo_sapiens ACC1        | TPEMFROSLIKLWBSMSTQAFLEPPLPSDILTYTELVLDDQGQLVHNMRLPGGNEIGMV      | 1697 |
| Mus_musculus ACC1        | TPEMFROSLIKLWBSMSTQAFLEPPLPSDILTYTELVLDDQGQLVHNMRLPGGNEIGMV      | 1659 |
| Bos_taurus ACC1          | TPEMFROSLIKLWBSMSTQAFLEPPLPSDILTYTELVLDDQGQLVHNMRLPGGNEIGMV      | 1660 |
| Capra_hircus ACC1        | TPEMFROSLIKLWBSMSTQAFLEPPLPSDILTYTELVLDDQGQLVHNMRLPGGNEIGMV      | 1697 |
| Danio_rerio ACC1         | TPEMFROALKKLMSSQAFLEPPLPSDILTYTELVLDDQGQLVHNMRLPGGNEIGMV         | 1738 |
| Sparus_aurata ACC1       | TPEMFROALKKLMSSQAFLEPPLPSDILTYTELVLDDQGQLVHNMRLPGGNEIGMV         | 1707 |
| Lates_calcarifer ACC1    | TPEMFROALKKLMSSQAFLEPPLPSDILTYTELVLDDQGQLVHNMRLPGGNEIGMV         | 1671 |
| Oncorhynchus_mykiss ACC1 | TPEMFROALKKLMSSQAFLEPPLPSDILTYTELVLDDQGQLVHNMRLPGGNEIGMV         | 1677 |
| Larimichthys_crocea ACC1 | TPEMFROALKKLMSSQAFLEPPLPSDILTYTELVLDDQGQLVHNMRLPGGNEIGMV         | 1760 |
| Consensus                | pem rq l k w s a lp plps lt telvld qgqlv mnrlpggneigmv           |      |
| Homo_sapiens ACC1        | AWKMTFKSPPEYDGRDIIIVICNDITYRIGSFGPQEDLFLRASELARAEGIPRIYVAANS     | 1757 |
| Mus_musculus ACC1        | AWKMTFKSPPEYDGRDIIIVICNDITYRIGSFGPQEDLFLRASELARAEGIPRIYVAANS     | 1719 |
| Bos_taurus ACC1          | AWKMTFKSPPEYDGRDIIIVICNDITYRIGSFGPQEDLFLRASELARAEGIPRIYVAANS     | 1720 |
| Capra_hircus ACC1        | AWKMTFKSPPEYDGRDIIIVICNDITYRIGSFGPQEDLFLRASELARAEGIPRIYVAANS     | 1757 |
| Danio_rerio ACC1         | AWRMTLRTPEYPAGREIIVISNDITHKIGSFGPQEDVLFQASEMARESGIPRIYVAANS      | 1798 |
| Sparus_aurata ACC1       | AWRMTLRTPEYPAGREIIVISNDITHKIGSFGPQEDVLFQASEMARESGIPRIYVAANS      | 1767 |
| Lates_calcarifer ACC1    | AWRMTLRTPEYPAGREIIVISNDITHKIGSFGPQEDVLFQASEMARESGIPRIYVAANS      | 1731 |
| Oncorhynchus_mykiss ACC1 | AWRMTLRTPEYPAGREIIVISNDITHKIGSFGPQEDLFLQASEMARESGIPRIYVAANS      | 1737 |
| Larimichthys_crocea ACC1 | AWRMTLRTPEYPAGREIIVISNDITHKIGSFGPQEDVLFQASEMARESGIPRIYVAANS      | 1820 |
| Consensus                | aw m peyp gr lii v ndit igsfgpqed lf ase r gipriy ans            |      |
| Homo_sapiens ACC1        | GARIGLAEIIRHMFHVAVWDPEDPYKGYKYLILTPQDYKRVSAALNSVHCEHVEDEGESRY    | 1817 |
| Mus_musculus ACC1        | GARIGLAEIIRHMFHVAVWDPEDPYKGYKYLILTPQDYKRVSAALNSVHCEHVEDEGESRY    | 1779 |
| Bos_taurus ACC1          | GARIGLAEIIRHMFHVAVWDPEDPYKGYKYLILTPQDYKRVSAALNSVHCEHVEDEGESRY    | 1780 |
| Capra_hircus ACC1        | GARIGLAEIIRHMFHVAVWDPEDPYKGYKYLILTPQDYKRVSAALNSVHCEHVEDEGESRY    | 1817 |
| Danio_rerio ACC1         | GARIGLAEIIRHMFHVAVWDPEDPYKGYKYLILTPQDYKRVSAALNSVHCEHVEDEGESRY    | 1858 |
| Sparus_aurata ACC1       | GARIGLAEIIRHMFHVAVWDPEDPYKGYKYLILTPQDYKRVSAALNSVHCEHVEDEGESRY    | 1827 |
| Lates_calcarifer ACC1    | GARIGLAEIIRHMFHVAVWDPEDPYKGYKYLILTPQDYKRVSAALNSVHCEHVEDEGESRY    | 1791 |
| Oncorhynchus_mykiss ACC1 | GARIGLAEIIRHMFHVAVWDPEDPYKGYKYLILTPQDYKRVSAALNSVHCEHVEDEGESRY    | 1797 |
| Larimichthys_crocea ACC1 | GARIGLAEIIRHMFHVAVWDPEDPYKGYKYLILTPQDYKRVSAALNSVHCEHVEDEGESRY    | 1880 |
| Consensus                | gariglaeiirhmfhvw d dpykgylyltpdykkrvsalnsvhcehveedgesry         |      |



|                          |                                                               |      |
|--------------------------|---------------------------------------------------------------|------|
| Homo_sapiens ACC1        | KITDIIGKEEGIGENIRGSGMIAGESSLAYNEIITISLVTORAIIGIGAYLVRLGORTIQ  | 1877 |
| Mus_musculus ACC1        | KITDIIGKEEGIGENIRGSGMIAGESSLAYDEVIITISLVTORAIIGIGAYLVRLGORTIQ | 1839 |
| Bos_taurus ACC1          | KITDIIGKEEGIGENIRGSGMIAGESSLAYDEIITISLVTORAIIGIGAYLVRLGORTIQ  | 1840 |
| Capra_hircus ACC1        | KITDIIGKEEGIGENIRGSGMIAGESSLAYDEIITISLVTORAIIGIGAYLVRLGORTIQ  | 1877 |
| Danio_rerio ACC1         | KITDIIGKEEGIGENIRGSGMIAGESSLAYDEIITMNLVTORAIIGIGAYLVRLGORTIQ  | 1918 |
| Sparus_aurata ACC1       | KITDIIGKDEGLGVENIRGSGMIAGESSLAYEIIITMNLVTORAIIGIGAYLVRLGORTIQ | 1887 |
| Lates_calcarifer ACC1    | KITDIIGKDEGLGVENIRGSGMIAGESSLAYEIIITMNLVTORAIIGIGAYLVRLGORTIQ | 1851 |
| Oncorhynchus_mykiss ACC1 | KITDIIGKEEGIGENIRGSGMIAGESSLAYDOVIITMNLVTORAIIGIGAYLVRLGORTIQ | 1857 |
| Larimichthys_crocea ACC1 | KITDIIGKDEGLGVENIRGSGMIAGESSLAYEIIITMNLVTORAIIGIGAYLVRLGORTIQ | 1940 |
| Consensus                | kitdiigk eg g enl gsgmiageSSLay it lvtcraigigaylvrlgqrtiq     |      |
| Homo_sapiens ACC1        | VENSHILITGAGALNKVLGREVYTSNNQLGGIQIMHNNGVTHSTVCDDFEGVFTVLHWLS  | 1937 |
| Mus_musculus ACC1        | VENSHILITGAGALNKVLGREVYTSNNQLGGIQIMHNNGVTHSTVCDDFEGVFTVLHWLS  | 1899 |
| Bos_taurus ACC1          | VENSHILITGAGALNKVLGREVYTSNNQLGGIQIMHNNGVTHSTVCDDFEGVFTVLHWLS  | 1900 |
| Capra_hircus ACC1        | VENSHILITGAGALNKVLGREVYTSNNQLGGIQIMHNNGVTHSTVCDDFEGVFTVLHWLS  | 1937 |
| Danio_rerio ACC1         | VENSHILITGAGALNKVLGREVYTSNNQLGGVQIMHNNGVTHSTVCDDFEGVFTVLHWLS  | 1978 |
| Sparus_aurata ACC1       | VDNSHILITGAGALNKVLGREVYTSNNQLGGIQIMHNNGVTHSTVCDDFEGVFTVLHWLS  | 1947 |
| Lates_calcarifer ACC1    | VDNSHILITGAGALNKVLGREVYTSNNQLGGIQIMHNNGVTHSTVCDDFEGVFTVLHWLS  | 1911 |
| Oncorhynchus_mykiss ACC1 | VENSHILITGAGALNKVLGREVYTSNNQLGGIQIMHNNGVTHSTVCDDFEGVFTVLHWLS  | 1917 |
| Larimichthys_crocea ACC1 | VDNSHILITGAGALNKVLGREVYTSNNQLGGIQIMHNNGVTHSTVCDDFEGVFTVLHWLS  | 2000 |
| Consensus                | v nsh iltgagalnkvlgrevytsnnqlgg qimhnngvth vccdfegv l wls     |      |
| Homo_sapiens ACC1        | YMPKSVHSSVPEILNSKDPIDRIIEFVPTKPYDPRWMLAGRPHPTQKQWLSGGFFDYGSF  | 1997 |
| Mus_musculus ACC1        | YMPKSVHSSVPEILNSKDPIDRIIEFVPTKPYDPRWMLAGRPHPTQKQWLSGGFFDYGSF  | 1959 |
| Bos_taurus ACC1          | YMPKSVYSSVPEILNSKDPIDRVIEFVPTKPYDPRWMLAGRPHPTQKQWLSGGFFDYGSF  | 1960 |
| Capra_hircus ACC1        | YMPKSVYSSVPEILNSKDPIDRVIEFVPTKPYDPRWMLAGRPHPTQKQWLSGGFFDYGSF  | 1997 |
| Danio_rerio ACC1         | YMPKNNSSVPEILSAKDPIDRAIEFVPTKPYDPRWMLAGRPHPTQKQWLSGGFFDYGSF   | 2038 |
| Sparus_aurata ACC1       | YMEFNKASVPEILNAKDPIDRLVEFVPTKPYDPRWMLAGRPHPTQKQWLSGGFFDYGSF   | 2007 |
| Lates_calcarifer ACC1    | YMPKCKSSVPEILSAKDPIDRPVEFVPTKPYDPRWMLAGRPHPTQKQWLSGGFFDYGSF   | 1971 |
| Oncorhynchus_mykiss ACC1 | YMPKDRSSVPEILNAKDPIDRLVEFVPTKPYDPRWMLAGRPHPTQKQWLSGGFFDYGSF   | 1977 |
| Larimichthys_crocea ACC1 | YMECKSSVPEILVHSDPIDRPVEFVPTKPYDPRWMLAGRPHPTQKQWLSGGFFDYGSF    | 2060 |
| Consensus                | ymp s vp kdpidr ef ptk pydprwm agrp kg w gffd gsf             |      |
| Homo_sapiens ACC1        | SEIMQPWAQIVVVGARLGGIPGVVAVETRTVELSIPADPANLDSEAKIIQQAGQVWF     | 2057 |
| Mus_musculus ACC1        | SEIMQPWAQIVVVGARLGGIPGVVAVETRTVELSIPADPANLDSEAKIIQQAGQVWF     | 2019 |
| Bos_taurus ACC1          | SEIMQPWAQIVVVGARLGGIPGVVAVETRTVELSIPADPANLDSEAKIIQQAGQVWF     | 2020 |
| Capra_hircus ACC1        | SEIMQPWAQIVVVGARLGGIPGVVAVETRTVELSIPADPANLDSEAKIIQQAGQVWF     | 2057 |
| Danio_rerio ACC1         | IEIMQPWAQIVVVGARLGGIPGVVAVETRSVELSIPADPANLDSEAKIIQQAGQVWF     | 2098 |
| Sparus_aurata ACC1       | MEIMQPWAQIVVVGARLGGIPGVVAVETRSVELSIPADPANLDSEAKIIQQAGQVWF     | 2067 |
| Lates_calcarifer ACC1    | MEIMQPWAQIVVVGARLGGIPGVVAVETRSVELSIPADPANLDSEAKIIQQAGQVWF     | 2031 |
| Oncorhynchus_mykiss ACC1 | MEIMQPWAQIVVVGARLGGIPGVVAVETRSVELSIPADPANLDSEAKIIQQAGQVWF     | 2037 |
| Larimichthys_crocea ACC1 | MEIMQPWAQIVVVGARLGGIPGVVAVETRSVELSIPADPANLDSEAKIIQQAGQVWF     | 2120 |
| Consensus                | eimqpwaq vvvgarlggip gvvavetr velsipadpanldseakiqqagqvwf      |      |
| Homo_sapiens ACC1        | DSAFKTYQAIKDENREGLPLIVFANWRGFGSGMKMDYDQVLKFGAYIVDGLRECSQPVIV  | 2117 |
| Mus_musculus ACC1        | DSAFKTYQAIKDENREGLPLIVFANWRGFGSGMKMDYDQVLKFGAYIVDGLRECSQPVIV  | 2079 |
| Bos_taurus ACC1          | DSAFKTYQAIKDENREGLPLIVFANWRGFGSGMKMDYDQVLKFGAYIVDGLRECSQPVIV  | 2080 |
| Capra_hircus ACC1        | DSAFKTYQAIKDENREGLPLIVFANWRGFGSGMKMDYDQVLKFGAYIVDGLRECSQPVIV  | 2117 |
| Danio_rerio ACC1         | DSAFKTYQAIKDENREGLPLIVFANWRGFGSGMKMDYDQVLKFGAYIVDGLREYKQPVIV  | 2158 |
| Sparus_aurata ACC1       | DSAFKTYQAIKDENREGLPLIVFANWRGFGSGMKMDYDQVLKFGAYIVDGLREYKQPVIV  | 2127 |
| Lates_calcarifer ACC1    | DSAFKTYQAIKDENREGLPLIVFANWRGFGSGMKMDYDQVLKFGAYIVDGLREYKQPVIV  | 2091 |
| Oncorhynchus_mykiss ACC1 | DSAFKTYQAIKDENREGLPLIVFANWRGFGSGMKMDYDQVLKFGAYIVDGLREYKQPVIV  | 2097 |
| Larimichthys_crocea ACC1 | DSAFKTYQAIKDENREGLPLIVFANWRGFGSGMKMDYDQVLKFGAYIVDGLREYKQPVIV  | 2180 |
| Consensus                | dsafkt qaikd nreglpl vfanwrgfsggmkm dydqlvkfgayivdglre qpv v  |      |
| Homo_sapiens ACC1        | YIPPOAELRGGSWVVIDSSINPRHMEMYADRESRGSVLEPEGTVEIKFRKDLVKTMRV    | 2177 |
| Mus_musculus ACC1        | YIPPOAELRGGSWVVIDPTINPRHMEMYADRESRGSVLEPEGTVEIKFRKDLVKTMRV    | 2139 |
| Bos_taurus ACC1          | YIPPOAELRGGSWVVIDPTINPRHMEMYADRESRGSVLEPEGTVEIKFRKDLVKTMRV    | 2140 |
| Capra_hircus ACC1        | YIPPOAELRGGSWVVIDPTINPRHMEMYADRESRGSVLEPEGTVEIKFRKDLVKTMRV    | 2177 |
| Danio_rerio ACC1         | YIPPOAELRGGSWVVIDPTINPRHMEMYADKDSRGSVLEPEGTVEIKFRKDLVKTMRV    | 2218 |
| Sparus_aurata ACC1       | YIPPOAELRGGSWVVIDPTINPRHMEMYADKDSRGSVLEPEGTVEIKFRKDLVKTMRV    | 2187 |
| Lates_calcarifer ACC1    | YIPPOAELRGGSWVVIDPTINPRHMEMYADKDSRGSVLEPEGTVEIKFRKDLVKTMRV    | 2151 |
| Oncorhynchus_mykiss ACC1 | YIPPOAELRGGSWVVIDPTINPRHMEMYADKDSRGSVLEPEGTVEIKFRKDLVKTMRV    | 2157 |
| Larimichthys_crocea ACC1 | YIPPOAELRGGSWVVIDPTINPRHMEMYADKDSRGSVLEPEGTVEIKFRKDLVKTMRV    | 2240 |
| Consensus                | yippoaelrggswvvid inprhmemyad srg vlepegtveikfr kdlvktmrv     |      |
| Homo_sapiens ACC1        | DPVYIHLAERLGTPELSPTBRKELESKLKEREFLPIYHQVAVQFADLHDTPGRMQEK     | 2237 |
| Mus_musculus ACC1        | DPVYIHLAERLGTPELSPTBRKELESKLKEREFLPIYHQVAVQFADLHDTPGRMQEK     | 2199 |
| Bos_taurus ACC1          | DPVYIHLAERLGTPELSVABRKELESKLKEREFLPIYHQVAVQFADLHDTPGRMQEK     | 2200 |
| Capra_hircus ACC1        | DPVYIHLAERLGTPELSAABRKELESKLKEREFLPIYHQVAVQFADLHDTPGRMQEK     | 2237 |
| Danio_rerio ACC1         | DPVYIMGLAERLGTPELSVBRKELESKLKEREFLPIYHQVAVQFADLHDTPGRMQEK     | 2278 |
| Sparus_aurata ACC1       | DPVYIHLAERLGTPELSPTBRKELESKLKEREFLPIYHQVAVQFADLHDTPGRMQEK     | 2247 |
| Lates_calcarifer ACC1    | DPVYIHLAERLGTPELSPTBRKELESKLKEREFLPIYHQVAVQFADLHDTPGRMQEK     | 2211 |
| Oncorhynchus_mykiss ACC1 | DPVYIMGLAERLGTPELSPTBRKELESKLKEREFLPIYHQVAVQFADLHDTPGRMQEK    | 2217 |
| Larimichthys_crocea ACC1 | DPVYIMGLAERLGTPELSPTBRKELESKLKEREFLPIYHQVAVQFADLHDTPGRMQEK    | 2300 |
| Consensus                | dpvy lae lgtpel rkele klkereeflpi yhqvavqfadhdtpgrmqekg       |      |
| Homo_sapiens ACC1        | VISDILDWKTSRTFFYWLRLRLLEDIVKVKIHNANPELTDGQIQAMLRWFVEVEGVK     | 2297 |
| Mus_musculus ACC1        | VINDILDWKTSRTFFYWLRLRLLEDIVKVKIHNANPELTDGQIQAMLRWFVEVEGVK     | 2259 |
| Bos_taurus ACC1          | VINDILDWKTSRTFFYWLRLRLLEDIVKVKIHNANPELTDGQIQAMLRWFVEVEGVK     | 2260 |
| Capra_hircus ACC1        | VINDILDWKTSRTFFYWLRLRLLEDIVKVKIHNANPELTDGQIQAMLRWFVEVEGVK     | 2297 |
| Danio_rerio ACC1         | VITDILEWTSRQFFYWLRLRLLEDIVKVKIQANSELTDGQVQAMLRWFVEVEGVK       | 2338 |
| Sparus_aurata ACC1       | VITDILEWTSRQFFYWLRLRLLEDIVKVKIQANSELTDGQVQAMLRWFVEVEGVK       | 2307 |
| Lates_calcarifer ACC1    | VITDILEWTSRQFFYWLRLRLLEDIVKVKIQANSELTDGQIQAMLRWFVEVEGVK       | 2271 |
| Oncorhynchus_mykiss ACC1 | VITDILEWTSRQFFYWLRLRLLEDIVKVKIQANSELTDGQIQAMLRWFVEVEGVK       | 2277 |
| Larimichthys_crocea ACC1 | VITDILEWTSRQFFYWLRLRLLEDIVKVKIQANSELTDGQVQAMLRWFVEVEGVK       | 2360 |
| Consensus                | vi dil w tsr ffywlrlrlle vk ki an eltdgq qamlrrwve eg vk      |      |

|                          |                                                                       |      |
|--------------------------|-----------------------------------------------------------------------|------|
| Homo_sapiens ACC1        | AYVWDNNKDLAEWLEKQLTEEDGVHSEENIKYISRDYVLKQIRSLVQANPEVAMDSIT            | 2357 |
| Mus_musculus ACC1        | AYVWDNNKDLAEWLEKQLTEEDGVRSVIEENIKYISRDYVLKQIRSLVQANPEVAMDSIV          | 2319 |
| Bos_taurus ACC1          | AYVWDNNKDLAEWLEKQLTEEDGVRSVIEENIKYISRDYVLKQIRSLVQANPEVAMDSIV          | 2320 |
| Capra_hircus ACC1        | AYVWDNNKDLAEWLEKQLTEEDGVRSVIEENIKYISRDYVLKQIRSLVQANPEVAMDSIV          | 2357 |
| Danio_rerio ACC1         | AYLWLSNEDVVEWLEKQLAEPEGARSVIDENIKYIRRDHILKQIRSLVQANPEVAMDSIV          | 2398 |
| Sparus_aurata ACC1       | AYLWDNNEEVVAWLEKQLAEPEGARSVIDENIKYIRRDHILKQIRSLVQANPEVAMDSIV          | 2367 |
| Lates_calcarifer ACC1    | AYLWDNNEEVVAWLEKQLAEPEGARSVIDENIKYIRRDHILKQIRSLVQANPEVAMDSIV          | 2331 |
| Oncorhynchus_mykiss ACC1 | AYLWLSNEDVVEWLEKQLKEPEGARSVIDENIKYIRRDHILKQIRSLVQANPEVAMDSIV          | 2337 |
| Larimichthys_crocea ACC1 | AYLWDNNEEVVAWLEKQLAEPEGARSVIDENIKYIRRDHILKQIRSLVQANPEVAMDSIV          | 2420 |
| Consensus                | ay wd n        wle ql ee g   s        enik i rd   lkqirslvqanpevamdsi |      |
| Homo_sapiens ACC1        | HMTQHISPTQRAEVIRILSTMDSPT.                                            | 2383 |
| Mus_musculus ACC1        | HMTQHISPTQRAEVVIRILSTMDSPT.                                           | 2345 |
| Bos_taurus ACC1          | HMTQHISPTQRAEVVIRILSTMDSPT.                                           | 2346 |
| Capra_hircus ACC1        | HMTQHISPTQRAEVVIRILSTMDSPT.                                           | 2383 |
| Danio_rerio ACC1         | HMTQHISPTQRAEVVIRILSTMDSPT.                                           | 2425 |
| Sparus_aurata ACC1       | HMTQHISATQRAEVVIRILSTMDSASS                                           | 2394 |
| Lates_calcarifer ACC1    | HMTQHISPTQRAEVVIRILSTMDSAPS                                           | 2358 |
| Oncorhynchus_mykiss ACC1 | HMTQHISPTQRAEVVIRILSTMDSAPAA                                          | 2364 |
| Larimichthys_crocea ACC1 | HMTQHISPTQRAEVVIRILSTMDSASS                                           | 2447 |
| Consensus                | hmtqhis tqr ev rilstm                                                 |      |

**Figure S3 Multiple sequence alignment of the deduced AA sequences of large yellow croaker ACC1 with other fish species or mammals.** Sequences comparison was performed using DNAMAN, and the identity/similarity shading is based on a 75% identity threshold. Identical residues are shown in dark blue shading and similar residues are shown in wathet blue shading. The identity shading is based on 89% identity threshold.



|                          |                                                               |     |
|--------------------------|---------------------------------------------------------------|-----|
| Homo_sapien ACC2         | MVLLLCLSCLIFSCLTFSWLKIWKMTDSKPITKSKSEANLIPSEQEPPASDNGSGTTPQR  | 60  |
| Mus_musculu ACC2         | MVLLLFLLTCLVFSCLTFSWLKIWKMTDSKPLTNSKVEANLLSSEESLSASELSQEQLOQE | 60  |
| Bos_taurus ACC2          | .....MSDSKQVTKSKRKVSFTSPSQEPIPASEGSQPPQE                      | 35  |
| Capra_hircus ACC2        | .....MSDSKQVTKSKRKVSFTSPSQEPIPAASDGSQPPQE                     | 35  |
| Danio_rerio ACC2         | .....                                                         | 0   |
| Sparus_aura ACC2         | .....MLPLAGLGLILWILLLLWINTKTVPMPVKGEPSPSG                     | 37  |
| Lates calcarifer ACC2    | .....MLPFAVLGLILWILLLLWRINTKTVPMPVKGEPSPSG                    | 37  |
| Oncorhynchus mykiss ACC2 | .....MLPPLLSGFLLVLWLL.WRIKDKMMLDQGVETPTGCG                    | 36  |
| Larimichthys crocea ACC2 | .....MLPFAVLGLILWILLLLWRINTKTVPMPVKGEPSPSG                    | 37  |
| Consensus                |                                                               |     |
| Homo_sapien ACC2         | NGEGHTLPKTESSQAEP.ASHKGPDKAGRRRNSLPSSHQKPPRNPLSSSDAAPSPE.LQAN | 118 |
| Mus_musculu ACC2         | HGDHSCLE.....SYRGPRDASQQRNSLPSSCQRPPRNPLSSNDTWPSPE.LQTN       | 108 |
| Bos_taurus ACC2          | DCNSSPLPKTESQAEL.ASHKGPQDTCQQRPSQSLPQNPPQNPLSSDDASPAR...QAN   | 91  |
| Capra_hircus ACC2        | GCNSSPLPETERQAEL.ASHKGPQDTCQQRPSPPQNPPQNPLSSDDASRAR...QAN     | 91  |
| Danio_rerio ACC2         | .....MPSQTP.....ISDCAGEHSPPMDFGLSSTSPRN.....                  | 29  |
| Sparus_aura ACC2         | CDPPPAEEVEESTQ.....SPHPGEHSSSAAPATAKRDGN.SLQVGGASG....VK      | 84  |
| Lates calcarifer ACC2    | RGSSAAKEDMETH.....TRHSGEHSLSAVETTSAHNDNNSALSDGTSAGPC...VK     | 87  |
| Oncorhynchus mykiss ACC2 | SSAAAAQEEMQAADGPTAAVHTAPVHEHSTPMVLASSTSDSGANSPTHTIDPSEGPMIPR  | 96  |
| Larimichthys crocea ACC2 | CGPPAAEEDMEVTQ.....SPHPGEHFLSTAEETSAHNEDT.SSQAGCAPAGQ...VK    | 86  |
| Consensus                |                                                               |     |
| Homo_sapien ACC2         | GTGTGLEATDT.....NGLSSSARPOGQAGSPSKEDKKQANIKRQOLMTNFILGSFDD    | 172 |
| Mus_musculu ACC2         | WTAAPGEVPPDA.....NGLSFPARPPSRTVSPSREDRKQAHIKRQOLMTNFILGSFDD   | 162 |
| Bos_taurus ACC2          | GSETEGEIPNT.....NDLSAPARPOGQARTLSREDRKQAHIKRQOLMTNFILGSFDD    | 145 |
| Capra_hircus ACC2        | GSGETEGEIPNT.....NDLSAPARPOGQARTLSREDRKQAHIKRQOLMTNFILGSFDD   | 145 |
| Danio_rerio ACC2         | ..EGIPESATSD.....PTDQ...SNITVSHIESHRPFGSGAQAK.EKLKFIICASD     | 77  |
| Sparus_aura ACC2         | TLDAAEPQASSE.....VNSEKPSLPPTACNPSTRKVPMLSSGPEAR.ERLKFILCASD   | 138 |
| Lates calcarifer ACC2    | TVDSEEPQSSSE.....INSELPSSPQTTCKPYRTNVPMLSSGPEAR.ERLKFILCASD   | 141 |
| Oncorhynchus mykiss ACC2 | AGGSQPPQASSEGMEQYQTQPSPFVPPPPSRTTRPKLSSGPEVFRACLKFIICASD      | 156 |
| Larimichthys crocea ACC2 | AVDTEALQESSE.....VNSEK...PPTTTSKTKVPMKSGPEGR.ERLKFILCASD      | 137 |
| Consensus                | filg d                                                        |     |
| Homo_sapien ACC2         | YSSDEDSVAGSSRESSTRKGS.....RASLGALSLEAYLTGEAETRVPTMR..         | 218 |
| Mus_musculu ACC2         | NSSDEDPAGSFQNSSSRKSS.....RASLGTLSEQEALNTSDPESHAPTMR..         | 208 |
| Bos_taurus ACC2          | NSSDEPDAGALFRQSSSRKGS.....RASLGTLSLETAHAAGETETCAPVIR..        | 191 |
| Capra_hircus ACC2        | NSSDEDTGAALFRQSSSRKGS.....RASLGTLSLETAQAAGETETCAPVIR..        | 191 |
| Danio_rerio ACC2         | NSSDDEP..LVKNQTTTHQPK.....NTETLNAEPTASSEMPPTFPVSTGLR..        | 122 |
| Sparus_aura ACC2         | NSSDDEP.LVTKPESGASQP.....QTSDRASPPQASSAAPQSS..SSGIK..         | 182 |
| Lates calcarifer ACC2    | NSSDDEP.LVAKPESGASQP.....QTSSLKSSPPQEPAPVQSS..SSGIK..         | 185 |
| Oncorhynchus mykiss ACC2 | NSSDDEPPLTMKPPTGSSSSSEATASTVRQTASATSTAFSPPPQVQSVTLTTT.SPGMR.. | 213 |
| Larimichthys crocea ACC2 | NSSDDEP.LVSKPESGASQP.....PASTNKSYPOEASTAARRSS..SSGIK..        | 181 |
| Consensus                | ssd                                                           |     |
| Homo_sapien ACC2         | .....PSMSGHLVKRGREHKKLDLHRDFTVASPAEFVTRFGGD                   | 257 |
| Mus_musculu ACC2         | .....PSMSGHLVKRGREHKKLDLHRDFTVASPAEFVTRFGGN                   | 247 |
| Bos_taurus ACC2          | .....PSMSGHLARRGREQKKVLDLHRDFTVASPAEFVTRFAGH                  | 230 |
| Capra_hircus ACC2        | .....PSMSGHLARRGREQKKVLDLHRDFTVASPAEFVTRFAGH                  | 230 |
| Danio_rerio ACC2         | .....PSMSGHLLKKGKEHRKMEVHRDFTVASPAEFVTRFGGN                   | 161 |
| Sparus_aura ACC2         | .....PSMSGHLVKKGREHRKMDLORDFTVASPAEFVTRFGGN                   | 221 |
| Lates calcarifer ACC2    | .....PSMSGHLLVKKGREHRKMDLORDFTVASPAEFVTRFGGN                  | 224 |
| Oncorhynchus mykiss ACC2 | .....PSMSHHLVKKREIRKMDLORDFTVASPAEFVTRFGGN                    | 252 |
| Larimichthys crocea ACC2 | .....PSMSGHLVKRGREHRKMDLORDFTVASPAEFVTRFGGN                   | 220 |
| Consensus                | psms hl e k rdtvaspaefv rf g                                  |     |
| Homo_sapien ACC2         | RVIEKVLIANNGIAAVKCMRSIRRWAYEMFRNERAIRFVVMVTPEDLKANAeyIKMADHY  | 317 |
| Mus_musculu ACC2         | RVIEKVLIANNGIAAVKCMRSIRRWAYEMFRNERAIRFVVMVTPEDLKANAeyIKMADHY  | 307 |
| Bos_taurus ACC2          | IVIEKVLIANNGIAAVKCMRSIRRWAYEMFRNERAIRFVVMVTPEDLKANAeyIKMADHY  | 290 |
| Capra_hircus ACC2        | IVIEKVLIANNGIAAVKCMRSIRRWAYEMFRNERAIRFVVMVTPEDLKANAeyIKMADHY  | 290 |
| Danio_rerio ACC2         | RIIDKVLIANNGIAAVKCMRSIRRWAYEMFRNERTIRFVVMVTPEDLKANAeyIKMADHY  | 221 |
| Sparus_aura ACC2         | RVIEKVLIANNGIAAVKCMRSIRRWAYEMFRNERTIRFVVMVTPEDLKANAeyIKMADHY  | 281 |
| Lates calcarifer ACC2    | RVIEKVLIANNGIAAVKCMRSIRRWAYEMFRNERTIRFVVMVTPEDLKANAeyIKMADHY  | 284 |
| Oncorhynchus mykiss ACC2 | RVINKVLIANNGIAAVKCMRSIRRWAYEMFRNERTIRFVVMVTPEDLKANAeyIKMADHY  | 312 |
| Larimichthys crocea ACC2 | RVIEKVLIANNGIAAVKCMRSIRRWAYEMFRNERTIRFVVMVTPEDLKANAeyIKMADHY  | 280 |
| Consensus                | i kvlianngiaavkcmrsirrw yemfrner irfvvmvtpedlkanaeyikmad y    |     |
| Homo_sapien ACC2         | VPVPGGPNNNNYANVELIVDIAKRIPVQAVWAGWGHAENPKLPELLCKNGVAFGLGPPSE  | 377 |
| Mus_musculu ACC2         | VPVPGGPNNNNYANVELIIDIAKRIPVQAVWAGWGHAENPKLPELLCKHEIAFLGPPSE   | 367 |
| Bos_taurus ACC2          | VPVPGGPNNNNYANVELIVDIAKRIPVQAVWAGWGHAENPKLPELLRKHEIAFLGPPSE   | 350 |
| Capra_hircus ACC2        | VPVPGGPNNNNYANVELIVDIAKRIPVQAVWAGWGHAENPKLPELLHKHEIAFLGPPSE   | 350 |
| Danio_rerio ACC2         | VPVPGGPNNNNYANVEMIVDIAKRIPVQAVWAGWGHAENPKLPELLHKSGICFLGPPSK   | 281 |
| Sparus_aura ACC2         | VPVPGGPNNNNYANVELIVDIAKRIPVQAVWAGWGHAENPKLPDLNKAIGISFLGPPSK   | 341 |
| Lates calcarifer ACC2    | VPVPGGPNNNNYANVELIVDIAKRIPVQAVWAGWGHAENPKLPELLNKAIGISFLGPPSK  | 344 |
| Oncorhynchus mykiss ACC2 | VPVPGGPNNNNYANVELIVDIAKRIPVQGVWAGWGHAENPKLPELLDKNGISFLGPPSK   | 372 |
| Larimichthys crocea ACC2 | VPVPGGPNNNNYANVELIVDIAKRIPVQAVWAGWGHAENPKLPELLNKAIGISFLGPPSK  | 340 |
| Consensus                | vpvpgg nn nyanve i diakripvq vwagwghasenpklp ll k flgp        |     |
| Homo_sapien ACC2         | AMWALGDKIASTVVAQTLQVPTLPWSGSLTIVETEDDLQQCKRISVPEDVYDKGCVKQDV  | 437 |
| Mus_musculu ACC2         | AMWALGDKIASTVVAQTLQIPTLPWSGSLTIVETEDDSRHQCKCISVPEDVYEQGCVKQDV | 427 |
| Bos_taurus ACC2          | AMWALGDKIASTVVAQTLQIPTLPWNGSLTIVETAEHSLQEQRISIPESVYNNNGCVKQDV | 410 |
| Capra_hircus ACC2        | AMWALGDKIASTVVAQTLQIPTLPWSGSLTIVETEEHSLQEQRISIPESVYNNNGCVKQDV | 410 |
| Danio_rerio ACC2         | AMWALGDKVASSIVAQSAGIPTLPWSCTGLSVTADEEQRQRLISVPPELVYQGCVKQDV   | 341 |
| Sparus_aura ACC2         | AMWALGDKVASSIVAQSADIPTLPWSGSLRVDAEDQKQGRVIVSVPPEVYTKGCVQDV    | 401 |
| Lates calcarifer ACC2    | AMWALGDKVASSIVAQSADIPTLPWSGSLRVDAAGVDQGLGNVIVSVPPEIYTKGCVQDV  | 404 |
| Oncorhynchus mykiss ACC2 | AMWALGDKVASSIVAQSADIPTLPWSGSLRVDAEDDDQRLGHVIVSVPPEVYVHGCVRDA  | 432 |
| Larimichthys crocea ACC2 | AMWALGDKVASSIVAQSADIPTLPWSGSLRVDAEDDQKLGNIIVSVPPEIYANGCVQDV   | 400 |
| Consensus                | amwalgdk as vaq ptlpw g gl v w g is p y gcv d                 |     |



|                          |                                                                 |     |
|--------------------------|-----------------------------------------------------------------|-----|
| Homo_sapien ACC2         | DEGLEAABRIKGFPLMIKASEGGGKGIRKAESAEEDFHLFROVQSETPGSPHFLMLKLAQH   | 497 |
| Mus_musculu ACC2         | DEGLQAABKIKGFPLMIKASEGGGKGIRKAESAEEDFHLFROVQSETPGSPHFLMLKLAQN   | 487 |
| Bos_taurus ACC2          | DEGLEAABKIKGFPLMIKASEGGGKGIRKAETAEEDFHLFROVQSETPGSPHFLMLKLAQH   | 470 |
| Capra_hircus ACC2        | DEGLEAABKIKGFPLMIKASEGGGKGIRKAETAEEDFHLFROVQSETPGSPHFLMLKLAQH   | 470 |
| Danio_rerio ACC2         | DEGLASABKICYPVVIKASEGGGKGIRKVESSEDFHSLFROVQAEVPGSPHIFIMOLAHEH   | 401 |
| Sparus_aura ACC2         | DDGLAGABRICYPVVIKASEGGGKGIRKVESSEDFATFFROVQTEVPGSPHIFIMOLAQH    | 461 |
| Lates_calcarifer ACC2    | DDGLAGABRICYPVVIKASEGGGKGIRKVESSEDFSSFRVQVQTEVPGSPHIFIMOLAQH    | 464 |
| Oncorhynchus mykiss ACC2 | DDGLAGADRICYPVVIKASEGGGKGIRKVDNAEDFASFROVQAEVPGSPHIFIMOLAQH     | 492 |
| Larimichthys_crocea ACC2 | DDGLAGABRICYPVVIKASEGGGKGIRKVECSDFEGFRVQVQTEVPGSPHIFIMOLAQH     | 460 |
| Consensus                | d gl a ig p ikasegggkgirk edf frqvq e pgsp f m la               |     |
| Homo_sapien ACC2         | ARHLEVQILADQYGNVSLFGRDCSIQRRHQKIVEEAPATIAPLAIFEEMEQCAIRLAKT     | 557 |
| Mus_musculu ACC2         | ARHLEVQVLADQYGNVSLFGRDCSIQRRHQKIEEAPATIAAPAVFEEMEQCAVRLAKM      | 547 |
| Bos_taurus ACC2          | ARHLEVQILADQYGNVSLFGRDCSIQRRHQKIEEAPATIAAPAVFEEMEQCAVRLAKT      | 530 |
| Capra_hircus ACC2        | ARHLEVQILADQYGNVSLFGRDCSIQRRHQKIEEAPATIAAPAVFEEMEQCAVRLAKT      | 530 |
| Danio_rerio ACC2         | ARHLEVQILADQYGNVSLFGRDCSIQRRHQKIEEAPASIASTITFEQMEQCAVRLAKM      | 461 |
| Sparus_aura ACC2         | ARHLEVQILADEYGNVSLFGRDCSIQRRHQKIEEAPATIAASSTFEQMEQCAVRLAKM      | 521 |
| Lates_calcarifer ACC2    | ARHLEVQILADEYGNVSLFGRDCSIQRRHQKIEEAPATIAALSTFEQMERVAVRLAKM      | 524 |
| Oncorhynchus mykiss ACC2 | ARHLEVQILADQYGNVSLFGRDCSIQRRHQKIEEAPATIASATTFEEMEQCAVRLAKM      | 552 |
| Larimichthys_crocea ACC2 | ARHLEVQILADEYGNVSLFGRDCSIQRRHQKIEEAPATIAATSTFEQMEQCAVRLAKM      | 520 |
| Consensus                | arhlevq lad ygna slfgrdcsiqrrhqki eeapa ia fe me a lak          |     |
| Homo_sapien ACC2         | VGYVSAGTVEYLYSCDGSFHFLELNPRLQVEHPCTEMIADVNLPAAQQLIAMCVPIHRRK    | 617 |
| Mus_musculu ACC2         | VGYVSAGTVEYLYSCDGSFHFLELNPRLQVEHPCTEMIADVNLPAAQQLIAMCVPIHRRK    | 607 |
| Bos_taurus ACC2          | VGYVSAGTVEYLYSCDGSFHFLELNPRLQVEHPCTEMIADVNLPAAQQLIAMCVPIHRRK    | 590 |
| Capra_hircus ACC2        | VGYVSAGTVEYLYSCDGSFHFLELNPRLQVEHPCTEMIADVNLPAAQQLIAMCVPIHRRK    | 590 |
| Danio_rerio ACC2         | VGYVSAGTVEYLFSEDDGSFHFLELNPRLQVEHPCTEMIADVNLPAAQQLIAMCPIPIHRRK  | 521 |
| Sparus_aura ACC2         | VGYVSAGTVEYLFSEDDGSFHFLELNPRLQVEHPCTEMIGDVNLPAAQQLIAMCPIPIHRRK  | 581 |
| Lates_calcarifer ACC2    | VGYVSAGTVEYLFSEDDGSFHFLELNPRLQVEHPCTEMIGDVNLPAAQQLIAMCPIPIHRRK  | 584 |
| Oncorhynchus mykiss ACC2 | VGYVSAGTVEYLFSEDDGSFHFLELNPRLQVEHPCTEMIGDVNLPAAQQLIAMCPIPIHRRK  | 612 |
| Larimichthys_crocea ACC2 | VGYVSAGTVEYLFSEDDGFHFLELNPRLQVEHPCTEMIGDVNLPAAQQLIAMCPIPIHRRK   | 580 |
| Consensus                | vgyvsagtvey l s dg fhflelnprlqvehpctemi dvnlpaaqlqiamg pl r k   |     |
| Homo_sapien ACC2         | DIRLLYGBSPWGVTFISFETESNPFLARGHVIAARITSENPDGFKPSSSGTVQELNFRSS    | 677 |
| Mus_musculu ACC2         | DIRLLYGBSPWGVTFEFTFLSPFIARGHVIAARITSENPDGFKPSSSGTVQELNFRSN      | 667 |
| Bos_taurus ACC2          | DIRLLYGBSPWGVTFISFETESNPFIARGHVIAARITSENPDGFKPSSSGTVQELNFRSS    | 650 |
| Capra_hircus ACC2        | DIRLLYGBSPWGVTFISFETESNPFIARGHVIAARITSENPDGFKPSSSGTVQELNFRSS    | 650 |
| Danio_rerio ACC2         | DIRVLFGBAPWGDITINFESECMCFPRGHVIAARITSENPDGFKPSSSGTVQELNFRSS     | 581 |
| Sparus_aura ACC2         | DIRLLYGBPPWGDITVINFEETECMPSRGRHVIAARITSENPDGFKPSSSGTVQELNFRSS   | 641 |
| Lates_calcarifer ACC2    | DIRLLYGBTPWGDITINFEETECMPSRGRHVIAARITSENPDGFKPSSSGTVQELNFRSS    | 644 |
| Oncorhynchus mykiss ACC2 | DIRVLYGBTPWGDITINFEADCVESRGRHVIAARITSENPDGFKPSSSGTVQELNFRSS     | 672 |
| Larimichthys_crocea ACC2 | DIRLLYGBTPWGDITINFEETHDCIPSRGRHVIAARITSENPDGFKPSSSGTVQELNFRSS   | 640 |
| Consensus                | dir l ge pwg i fe p p rghvia ritsenpdgfkpsssgtvqelnfrs          |     |
| Homo_sapien ACC2         | KNVWGYFSVAATGGLHEFADSQFGHCFSWGENREEAISNMVVALKELIRGDFRTTVEYL     | 737 |
| Mus_musculu ACC2         | KNVWGYFSVAAGGLHEFADSQFGHCFSWGENREEAISNMVVALKELIRGDFRTTVEYL      | 727 |
| Bos_taurus ACC2          | KNVWGYFSVAATGGLHEFADSQFGHCFSWGENREEAISNMVVALKELIRGDFRTTVEYL     | 710 |
| Capra_hircus ACC2        | KNVWGYFXVAATGGLHEFTDSQFGHCFSWGENREEAISNMVVALKELIRGDFRTTVEYL     | 710 |
| Danio_rerio ACC2         | KNVWGYFSVCGATGGLHEFADSQFGHCFSWGENREEAISNMVVAMKELIRGDFRTTVEYL    | 641 |
| Sparus_aura ACC2         | KNVWGYFSVCGATGGLHEFADSQFGHCFSWGENREEAISNMVVAMKELIRGDFRTTVEYL    | 701 |
| Lates_calcarifer ACC2    | KNVWGYFSVCGATGGLHEFADSQFGHCFSWGENREEAISNMVVAMKELIRGDFRTTVEYL    | 704 |
| Oncorhynchus mykiss ACC2 | KNVWGYFSVCAAGGLHEFADSQFGHCFSWGENREEAISNMVVAMKELIRGDFRTTVEYL     | 732 |
| Larimichthys_crocea ACC2 | KNVWGYFSVCGATGGLHEFADSQFGHCFSWGENREEAISNMVVAMKELIRGDFRTTVEYL    | 700 |
| Consensus                | knvwgyf v a gglhef dsqfghcfswgenreeaisnmvva kel irgdftrttvey l  |     |
| Homo_sapien ACC2         | TNLLLETESFQNNNDIDTGWLDHLIAEKVQAEKPDITMLGVVCGALNVADAMFRTQMTDFLHS | 797 |
| Mus_musculu ACC2         | VNLLLETESFQNNNDIDTGWLDHLIAORVQAEKPDITMLGVVCGALNVADAMFRTQMTDFLHS | 787 |
| Bos_taurus ACC2          | TNLLLETENFQNNNDIDTSWLDNLIAEKVQAEKPDITMLGVVCGALNVADSMFRTQMTDFLHS | 770 |
| Capra_hircus ACC2        | TNLLLETENFQNNNDIDTSWLDNLIAEKVQAEKPDITMLGVVCGALNVADSMFRTQMTDFLHS | 770 |
| Danio_rerio ACC2         | TKLLETESFRNNNDIDTGWLDHLIAADKVQAEKPDITMLGVVCGALNVADASFRESMSDFLHS | 701 |
| Sparus_aura ACC2         | TKLLETESFRNNNDIDTGWLDHLIAEKVQAEKPDITMLGVVCGALNVADAFRKSMSDFLHS   | 761 |
| Lates_calcarifer ACC2    | TKLLETESFRNNNDIDTGWLDHLIAEKVQAEKPDITMLGVVCGALNVADAFRKSMSDFLHS   | 764 |
| Oncorhynchus mykiss ACC2 | TKLLETESFRNNNDIDTGWLDHLIAADKVQAEKPDITMLGVVCGALNVADAFRKSMSDFLHS  | 792 |
| Larimichthys_crocea ACC2 | TKLLETESFRNNNDIDTGWLDHLIAEKVQAEKPDITMLGVVCGALNVADAFRKSMSDFLHS   | 760 |
| Consensus                | llete f ndidt wld lia vqae pd lg vvgal vad fr m lhs             |     |
| Homo_sapien ACC2         | LERGOVLPADSLNLIVDVELIYGGVKYILKVARQSPITMFVLIIMNGCHIEIDAHRLINDGGL | 857 |
| Mus_musculu ACC2         | LERGOVLPADSLNLIVDVELIYGGIKYALKVARQSPITMFVLIIMNGCHIEIDAHRLINDGGL | 847 |
| Bos_taurus ACC2          | LERGOVLPADSLNLIVDVELIYGGVKYILKVARQSPITMFVLIIMNGSHIEIDAHRLINDGGL | 830 |
| Capra_hircus ACC2        | LERGOVLPADSLNLIVDVELIYGGVKYILKVARQSPITMFVLIIMNGSHIEIDAHRLINDGGL | 830 |
| Danio_rerio ACC2         | LERGOVLPASLVNTVNVLDLIYDGVKYCLKVARQSPITYVIMMNGSDIEVDVHRLSDGGL    | 761 |
| Sparus_aura ACC2         | LERGOVLPASSLNLSVTVLDLIYEGVKYCLKVARQSPITYVIMMNGSNIEIDVHRLINDGGL  | 821 |
| Lates_calcarifer ACC2    | LERGOVLPASSLNLSVNVLDLIYEGVKCLKVARQSPITYVIMMNGSNIEIDVHRLSDGGL    | 824 |
| Oncorhynchus mykiss ACC2 | LERGOVLPASLLNTVVDLIYEGVKYCLKVARQSPITYVIMMNGSDIEIDVHRLSDGGL      | 852 |
| Larimichthys_crocea ACC2 | LERGOVLPASSLNLSVVDLIYEGVKYCLKVARQSPITYVIMMNGSNIEIDVHRLSDGGL     | 820 |
| Consensus                | lergqvlpa sl n v v liy g k lkvarqs t v mn ie d hrl dgg l        |     |
| Homo_sapien ACC2         | LLSYNGSSYTTYMKEEVDSYRITIGNKTCVFEKENDPVTVLRSPSAGKLYOYITVEDGGHVE  | 917 |
| Mus_musculu ACC2         | LLSYNGSSYTTYMKEEVDSYRITIGNKTCVFEKENDPVTVLRSPSAGKLYOYITVEDGDHVE  | 907 |
| Bos_taurus ACC2          | LLSCSGNSYTTYMKEEVDSYRITIGNKTCVFEKENDPVTVLRSPSAGKLYKYITVADGEHVE  | 890 |
| Capra_hircus ACC2        | LLSCSGNSYTTYMKEEVDSYRITIGNKTCVFEKENDPVTVLRSPSAGKLYKYITVADGEHVE  | 890 |
| Danio_rerio ACC2         | LLSYGSSSYTTYMKEEIDRYRVTVGNKTCVFEKERDPTVLRSPSAGKLYOYVITDGSVHS    | 821 |
| Sparus_aura ACC2         | LLSYDGSSHTTYMKEEIDSYRITVGNKTCVFEKETDPTVLRSPSAGKLYOYITVEDGDHVC   | 881 |
| Lates_calcarifer ACC2    | LLSYDGSSHTTYMKEEVDSYRITVGNKTCVFEKETDPTVLRSPSAGKLYOYITVEDGGHIF   | 884 |
| Oncorhynchus mykiss ACC2 | LLSYNGSSYTTYMKEEVDSYRITVGNKTCVFEKERDPTVLRSPSAGKLYOYITVEDGGHIF   | 912 |
| Larimichthys_crocea ACC2 | LLSYDGSSHTTYMKEEVDSYRITVGNKTCVFEKETDPTVLRSPSAGKLYOYITCEDGAHVC   | 880 |
| Consensus                | lls g s tty kee d yr t gntctvfeke dptvlrs sagkl y dg h          |     |



|                          |                                                                |     |
|--------------------------|----------------------------------------------------------------|-----|
| Homo_sapien ACC2         | AGSSYAEMEVMKMTITINVOESGRVKYIKRPGAVLEBAGCVVARLELDDPSKVHPAEPTFG  | 977 |
| Mus_musculu ACC2         | AGSSYAEMEVMKMTITINVOESGRVKYIKRPGVILEBAGCVVARLELDDPSKVHAACTPTFG | 967 |
| Bos_taurus ACC2          | AGGSYAIEIEMKMTITINVOESGRVKYVRRPGAVLEBAGCVVARLELDDPSKVHPAEPTFG  | 950 |
| Capra_hircus ACC2        | AGGSYAIEIEMKMTITINVOESGRVKYVRRPGAVLEBAGCVVARLELDDPSKVHPAEPTFG  | 950 |
| Danio_rerio ACC2         | ASQBYAEIEVMKMTITLHVHSGCIRFLKRPGLVLEBGCIVALMDLDDPSCHIQVKPNTIE   | 881 |
| Sparus_aura ACC2         | AGETYAEIEVMKMTITITVQSGCIHFVKRPGAVLEBGCVVVARILDHSSVHRVELNITA    | 941 |
| Lates_calcarifer ACC2    | AGETYAEIEVMKMTITITVQSGCIHFVKRPGAVLEBGCVMHMDLDDPSSIHRVELNITA    | 944 |
| Oncorhynchus mykiss ACC2 | AGNSYAIEIEMKMTITITVESGCVHYVKRHGAVLEBGCVVVARILDHDDPSNIQPVLENTA  | 972 |
| Larimichthys_crocea ACC2 | AGETYAEIEVMKMTITITVQSGCIHFVKRPGAVLEBGCVVVARILDHDDPSSIHLVELNITA | 940 |
| Consensus                | a yae evmkm tlv g r g le g a ldd s                             |     |

|                          |                                                                |      |
|--------------------------|----------------------------------------------------------------|------|
| Homo_sapien ACC2         | BLPACQTLPLTIGEKLVHVFHVSLENLTNVMGFCLEPEPFSSIKLKEWVKQLMMLTLRHPSL | 1037 |
| Mus_musculu ACC2         | BLPACQTLPLTIGEKLVHVFHVSLENLTNVMGFCLEPEPFSSIKLKEWVKQLMMLTLRHPSL | 1027 |
| Bos_taurus ACC2          | BLPSCPTPLTIGEKLVHVFHVSLENLTNVMGFCLEPEPFSSIKLKEWVKQLMMLTLRHPSL  | 1010 |
| Capra_hircus ACC2        | BLPSCPTPLTIGEKLVHVFHVSLENLTNVMGFCLEPEPFSSIKLKEWVKQLMMLTLRHPSL  | 1010 |
| Danio_rerio ACC2         | BLPACQPLPMVGERLVHVFHVSLENLTNVMGFCLEPEPFSSIKLKEWVKQLMMLTLRHPSL  | 941  |
| Sparus_aura ACC2         | ALPFCQPLPMVGERLVHVFHVSLENLTNVMGFCLEPEPFSSIKLKEWVKQLMMLTLRHPSL  | 1001 |
| Lates_calcarifer ACC2    | ILPFCQPLPMVGERLVHVFHVSLENLTNVMGFCLEPEPFSSIKLKEWVKQLMMLTLRHPSL  | 1004 |
| Oncorhynchus mykiss ACC2 | SFPACQPLPMVGERLVHVFHVSLENLTNVMGFCLEPEPFSSIKLKEWVKQLMMLTLRHPSL  | 1032 |
| Larimichthys_crocea ACC2 | ILPFCQPLPMVGERLVHVFHVSLENLTNVMGFCLEPEPFSSIKLKEWVKQLMMLTLRHPSL  | 1000 |
| Consensus                | p q lp ge lhqvfh vlenl m g cl ep fs k k wv l lr psl            |      |

|                          |                                                              |      |
|--------------------------|--------------------------------------------------------------|------|
| Homo_sapien ACC2         | PLLELQEIMTSVAGRIEAPVEKSVRRVMAQYASNITSVLCQFPSC.....           | 1082 |
| Mus_musculu ACC2         | PLLELQEIMTSVAGRIEAPVEKSVRRVMAQYASNITSVLCQFPSCQCWASGTLGKHSTTE | 1087 |
| Bos_taurus ACC2          | PLLELQEIMTSVSGRVEAPVEKSVRRVMAQYASNITSVLCQFPSC.....           | 1055 |
| Capra_hircus ACC2        | PLLELQEIMTSVSGRVEAPVEKSVRRVMAQYASNITSVLCQFPSC.....           | 1055 |
| Danio_rerio ACC2         | PLLELQEIMTSVAGRIEAPVEKSVRRVMAQYASNITSVLCQFPSC.....           | 986  |
| Sparus_aura ACC2         | PLLELQEIMTSVAGRIEAPVEKSVRRVMAQYASNITSVLCQFPSC.....           | 1046 |
| Lates_calcarifer ACC2    | PLLELQEIMTSVAGRIEAPVEKSVRRVMAQYASNITSVLCQFPSC.....           | 1049 |
| Oncorhynchus mykiss ACC2 | PLLELQEIMTSVAGRIEAPVEKSVRRVMAQYASNITSVLCQFPSC.....           | 1077 |
| Larimichthys_crocea ACC2 | PLLELQEIMTSVAGRIEAPVEKSVRRVMAQYASNITSVLCQFPSC.....           | 1045 |
| Consensus                | pllelqe mtsv r p vek r vmaqyasnitsvlcqfpsq                   |      |

|                          |                                                         |      |
|--------------------------|---------------------------------------------------------|------|
| Homo_sapien ACC2         | .....CIATILDCHAATLQKADREFFINTQSIQVLQYRSGIRGYMKSVVLDLIR  | 1136 |
| Mus_musculu ACC2         | LHPELLKIATILDCHAATLQKADREFFINTQSIQVLQYRSGIRGYMKSVVLDLIR | 1147 |
| Bos_taurus ACC2          | .....CIATILDCHAATLQKADREFFINTQSIQVLQYRSGIRGYMKSVVLDLIR  | 1109 |
| Capra_hircus ACC2        | .....CIATILDCHAATLQKADREFFINTQSIQVLQYRSGIRGYMKSVVLDLIR  | 1109 |
| Danio_rerio ACC2         | .....RIANILDSHAATLQKADREFFINTQSIQVLQYRSGIRGYMKSVVLDLIR  | 1040 |
| Sparus_aura ACC2         | .....RIANILDSHAATLQKADREFFINTQSIQVLQYRSGIRGYMKSVVLDLIR  | 1100 |
| Lates_calcarifer ACC2    | .....RIANILDSHAATLQKADREFFINTQSIQVLQYRSGIRGYMKSVVLDLIR  | 1103 |
| Oncorhynchus mykiss ACC2 | .....RIANILDSHAATLQKADREFFINTQSIQVLQYRSGIRGYMKSVVLDLIR  | 1131 |
| Larimichthys_crocea ACC2 | .....RIANILDSHAATLQKADREFFINTQSIQVLQYRSGIRGYMKSVVLDLIR  | 1099 |
| Consensus                | ia ld haatlq kadre ff ntqsiqlvq yrsq rgymk vvl ll       |      |

|                          |                                                              |      |
|--------------------------|--------------------------------------------------------------|------|
| Homo_sapien ACC2         | YLRVHHFQQAHYDKCVINLRECHKPDMSQVLDLIFSHAOVAKKNOLVIMLIDELCGPDP  | 1196 |
| Mus_musculu ACC2         | YLRVHHFQQAHYDKCVINLRECHKPDMSQVLDLIFSHAOVAKKNOLVIMLIDELCGPDP  | 1207 |
| Bos_taurus ACC2          | YLLVHHFQQAHYDKCVINLRECHKPDMSQVLDLIFSHAOVAKKNOLVIMLIDELCGPDP  | 1169 |
| Capra_hircus ACC2        | YLLVHHFQQAHYDKCVINLRECHKPDMSQVLDLIFSHAOVAKKNOLVIMLIDELCGPDP  | 1169 |
| Danio_rerio ACC2         | YLOVEMCFQQAHYDKCVINLRECHKPDMSQVLDLIFSHAOVAKKNOLVIMLIDELCGPDP | 1100 |
| Sparus_aura ACC2         | YLEVEVTFQQAHYDKCVINLRECHKPDMSQVLDLIFSHAOVAKKNOLVIMLIDELCGPDP | 1160 |
| Lates_calcarifer ACC2    | YLOVEMCFQQAHYDKCVINLRECHKPDMSQVLDLIFSHAOVAKKNOLVIMLIDELCGPDP | 1163 |
| Oncorhynchus mykiss ACC2 | YLOVEMCFQQAHYDKCVINLRECHKPDMSQVLDLIFSHAOVAKKNOLVIMLIDELCGPDP | 1191 |
| Larimichthys_crocea ACC2 | YLOVEMCFQQAHYDKCVINLRECHKPDMSQVLDLIFSHAOVAKKNOLVIMLIDELCGPDP | 1159 |
| Consensus                | yl ve fqqahydkcvinlre ch kpdms vl ifsh qv kkn lv lid lc d    |      |

|                          |                                                                |      |
|--------------------------|----------------------------------------------------------------|------|
| Homo_sapien ACC2         | SLSDELTSLDELTLQLSKSEPHCKVALRARQVLIASHLPSYELRHNQVESIFLSAIDMYGH  | 1256 |
| Mus_musculu ACC2         | SLSDELTSLDELTLQLSKSEPHCKVALRARQVLIASHLPSYELRHNQVESIFLSAIDMYGH  | 1267 |
| Bos_taurus ACC2          | SLSDELTSLDELTLQLSKSEPHCKVALRARQVLIASHLPSYELRHNQVESIFLSAIDMYGH  | 1229 |
| Capra_hircus ACC2        | SLSDELTSLDELTLQLSKSEPHCKVALRARQVLIASHLPSYELRHNQVESIFLSAIDMYGH  | 1229 |
| Danio_rerio ACC2         | TLADELMVILDELTLQLSKSEPHCKVALRARQVLIASHLPSYELRHNQVESIFLSAIDMYGH | 1160 |
| Sparus_aura ACC2         | TLADELMVILDELTLQLSKSEPHCKVALRARQVLIASHLPSYELRHNQVESIFLSAIDMYGH | 1220 |
| Lates_calcarifer ACC2    | TLADELMVILDELTLQLSKSEPHCKVALRARQVLIASHLPSYELRHNQVESIFLSAIDMYGH | 1223 |
| Oncorhynchus mykiss ACC2 | TLADELMVILDELTLQLSKSEPHCKVALRARQVLIASHLPSYELRHNQVESIFLSAIDMYGH | 1251 |
| Larimichthys_crocea ACC2 | TLADELMVILDELTLQLSKSEPHCKVALRARQVLIASHLPSYELRHNQVESIFLSAIDMYGH | 1219 |
| Consensus                | l el il e tql e kvalrarq liashlpsyelrhqnqvesiflsaidmygh        |      |

|                          |                                                              |      |
|--------------------------|--------------------------------------------------------------|------|
| Homo_sapien ACC2         | QFCPENLKKLILSETTIFDVLPTFFYHANKVVCMAALEVYVRRGYIAYELNSTQHROLOD | 1316 |
| Mus_musculu ACC2         | QFCPENLKKLILSETTIFDVLPTFFYHANKVVCMAALEVYVRRGYIAYELNSTQHROLOD | 1327 |
| Bos_taurus ACC2          | QFCPENLKKLILSETTIFDVLPTFFYHANKVVCMAALEVYVRRGYIAYELNSTQHROLOD | 1289 |
| Capra_hircus ACC2        | QFCPENLKKLILSETTIFDVLPTFFYHANKVVCMAALEVYVRRGYIAYELNSTQHROLOD | 1289 |
| Danio_rerio ACC2         | QFCPENLKKLILSETTIFDVLPTFFYHANKVVCMAALEVYVRRGYIAYELNSTQHROLOD | 1220 |
| Sparus_aura ACC2         | QFCPENLKKLILSETTIFDVLPTFFYHANKVVCMAALEVYVRRGYIAYELNSTQHROLOD | 1280 |
| Lates_calcarifer ACC2    | QFCPENLKKLILSETTIFDVLPTFFYHANKVVCMAALEVYVRRGYIAYELNSTQHROLOD | 1283 |
| Oncorhynchus mykiss ACC2 | QFCPENLKKLILSETTIFDVLPTFFYHANKVVCMAALEVYVRRGYIAYELNSTQHROLOD | 1311 |
| Larimichthys_crocea ACC2 | QFCPENLKKLILSETTIFDVLPTFFYHANKVVCMAALEVYVRRGYIAYELNSTQHROLOD | 1279 |
| Consensus                | qfcpenlkkilset ifdvlp ffyh n vvcmaalevyvrrgyiayelns qh d     |      |

|                          |                                                   |      |
|--------------------------|---------------------------------------------------|------|
| Homo_sapien ACC2         | GTCVVEFQFMLPSSHNP.....RMTVEISITNPD.               | 1345 |
| Mus_musculu ACC2         | GTCVVEFQFMLPSSHNP.....RMAVEISVSNPD.               | 1356 |
| Bos_taurus ACC2          | GTCVVEFQFMLPSSHNP.....RMTVEISVTNPE.               | 1318 |
| Capra_hircus ACC2        | GTCVVEFQFMLPSSHNP.....RMTVEISVTNPE.               | 1318 |
| Danio_rerio ACC2         | GTCVVEFQFMLPSSHNP.....RMTVEISVTNPE.               | 1272 |
| Sparus_aura ACC2         | GTCVVEFQFMLPSSHNP.....GSSPTLNSLCVCLVSRVFPVSGSGQF. | 1325 |
| Lates_calcarifer ACC2    | GTCVVEFQFMLPSSHNP.....GSSPTLNSLCVCLVSRVFPVSGSGQF. | 1320 |
| Oncorhynchus mykiss ACC2 | GTCVVEFQFMLPSSHNP.....GSSPTLNSLCVCLVSRVFPVSGSGQF. | 1348 |
| Larimichthys_crocea ACC2 | GTCVVEFQFMLPSSHNP.....GSSPTLNSLCVCLVSRVFPVSGSGQF. | 1316 |
| Consensus                | g c v fqfmlpsshnp.....r p                         |      |



|                          |                                                                |      |
|--------------------------|----------------------------------------------------------------|------|
| Homo_sapien ACC2         | .LLRHSTELFMDSGFSPLCORMGAMVAFRFEEDFTRNFDEVISCFANVPKDTPLFSEART   | 1404 |
| Mus_musculu ACC2         | .LLRHSTELFMDSGFSPLCORMGAMVAFRFEEDFTRNFDEVISCFANVQDTLLFSKACT    | 1415 |
| Bos_taurus ACC2          | .LLRHSTELFMDSGFSPLCORMGAMVAFRFEEDFTRNFDEVISCFANMPKDTPLFSEARN   | 1377 |
| Capra_hircus ACC2        | .LLRHSTELFMDSGFSPLCORMGAMVAFRFEEDFTRNFDEVISCFANVPKDTPLFSEARN   | 1377 |
| Danio_rerio ACC2         | AMRRQGSSEFLLEGALSPFCORMGAMVAFHSEDFHKKCFDEVICRFVDPCESSLEFDGCS   | 1332 |
| Sparus_aura ACC2         | KMRQSSSEFLDGLSLSPFCORMGAMVAFCVDDFKRNFDEVLSFAEPILLETAPYSES.S    | 1384 |
| Lates calcarifer ACC2    | KMRQGSSEFLLEGALSPFCORMGAMVAFCFDDFKRNFDEVLSFAEPILLETAPYSES.S    | 1380 |
| Oncorhynchus mykiss ACC2 | EMRRQGSSEFLDGAFSPPFCORMGAMVAFCFDDFKRNFDEVLSFAEPILLESPLFEACP    | 1408 |
| Larimichthys_crocea ACC2 | KMRQSSSEFLLEGALSPFCORMGAMVAFCFDDFKRNFDEVLSFAEPILLESPLFEACPS    | 1376 |
| Consensus                | r elf sp qr gamvaf f r dev f                                   |      |
| Homo_sapien ACC2         | SLYSEDDCKSIREDPIHILNVSTOCADHLDEALVPILRTFVQSKKNIIVDYGLRRITFL    | 1464 |
| Mus_musculu ACC2         | SLYSEDDCKSIREDPIHILNVSTOCADHLDEALVPVFAFVQSKKNIIVDYGLRRITFL     | 1475 |
| Bos_taurus ACC2          | SLYSEDDCKSIREDPIHILNVSTOCADHLDEALVPILRTFVQSKKNIIVDYGLRRITFL    | 1437 |
| Capra_hircus ACC2        | SLYSEDDCKSIREDPIHILNVSTOCADHLDEALVPILRTFVQSKKNIIVDYGLRRITFL    | 1437 |
| Danio_rerio ACC2         | TFCDGESCKNMKENPIHITINVSTKQADTEDDDALVTAFTAFASKKSLIYDYGIIRRVTF   | 1392 |
| Sparus_aura ACC2         | SLYSEDDCKSIREDPIHITINVSTKQADTEDDDALVTAFTAFASKKSLIYDYGIIRRVTF   | 1444 |
| Lates calcarifer ACC2    | SLYSEDDCKSIREDPIHITINVSTKQADTEDDDALVTAFTAFASKKSLIYDYGIIRRVTF   | 1440 |
| Oncorhynchus mykiss ACC2 | SLYSEDDCKSIREDPIHITINVSTKQADTEDDDALVTAFTAFASKKSLIYDYGIIRRVTF   | 1468 |
| Larimichthys_crocea ACC2 | SLYSEDDCKSIREDPIHITINVSTKQADTEDDDALVTAFTAFASKKSLIYDYGIIRRVTF   | 1436 |
| Consensus                | e pihi nv ad d lv f sk l g rr tfl                              |      |
| Homo_sapien ACC2         | IAQKEFFPKFFTFRARDGFEDRIYRNLEPALAFQLELNMRNFDLTAVPCANHKMHLYL     | 1524 |
| Mus_musculu ACC2         | IAQKEFFPKFFTFRARDGFEDRIYRNLEPALAFQLELNMRNFDLTAVPCANHKMHLYL     | 1535 |
| Bos_taurus ACC2          | IAQKEFFPKFFTFRARDGFEDRIYRNLEPALAFQLELNMRNFDLTAVPCANHKMHLYL     | 1497 |
| Capra_hircus ACC2        | IAQKEFFPKFFTFRARDGFEDRIYRNLEPALAFQLELNMRNFDLTAVPCANHKMHLYL     | 1497 |
| Danio_rerio ACC2         | IAQKEFFPKFFTFRARDGFEDRIYRNLEPALAFQLELNMRNFDLTAVPCANHKMHLYL     | 1452 |
| Sparus_aura ACC2         | IAQKEFFPKFFTFRARDGFEDRIYRNLEPALAFQLELNMRNFDLTAVPCANHKMHLYL     | 1504 |
| Lates calcarifer ACC2    | IAQKEFFPKFFTFRARDGFEDRIYRNLEPALAFQLELNMRNFDLTAVPCANHKMHLYL     | 1500 |
| Oncorhynchus mykiss ACC2 | IAQKEFFPKFFTFRARDGFEDRIYRNLEPALAFQLELNMRNFDLTAVPCANHKMHLYL     | 1528 |
| Larimichthys_crocea ACC2 | IAQKEFFPKFFTFRARDGFEDRIYRNLEPALAFQLELNMRNFDLTAVPCANHKMHLYL     | 1496 |
| Consensus                | aq efpk ftfrard f edriyr lepalafql el r rnf a pca m yl         |      |
| Homo_sapien ACC2         | GAARVQEGAEVTDYRFFIRAIIRHSDLTITKEASFEYLQNEGERLLLEAMDELEVAHNTS   | 1584 |
| Mus_musculu ACC2         | GAARVQEGAEVTDYRFFIRAIIRHSDLTITKEASFEYLQNEGERLLLEAMDELEVAHNTS   | 1595 |
| Bos_taurus ACC2          | GAARVQEGAEVTDYRFFIRAIIRHSDLTITKEASFEYLQNEGERLLLEAMDELEVAHNTS   | 1557 |
| Capra_hircus ACC2        | GAARVQEGAEVTDYRFFIRAIIRHSDLTITKEASFEYLQNEGERLLLEAMDELEVAHNTS   | 1557 |
| Danio_rerio ACC2         | GAARVQEGAEVTDYRFFIRAIIRHSDLTITKEASFEYLQNEGERLLLEAMDELEVAHNTS   | 1512 |
| Sparus_aura ACC2         | GAARVQEGAEVTDYRFFIRAIIRHSDLTITKEASFEYLQNEGERLLLEAMDELEVAHNTS   | 1564 |
| Lates calcarifer ACC2    | GAARVQEGAEVTDYRFFIRAIIRHSDLTITKEASFEYLQNEGERLLLEAMDELEVAHNTS   | 1560 |
| Oncorhynchus mykiss ACC2 | GAARVQEGAEVTDYRFFIRAIIRHSDLTITKEASFEYLQNEGERLLLEAMDELEVAHNTS   | 1588 |
| Larimichthys_crocea ACC2 | GAARVQEGAEVTDYRFFIRAIIRHSDLTITKEASFEYLQNEGERLLLEAMDELEVAHNTS   | 1556 |
| Consensus                | gaa v eg evt d r fir i r hsdltitkeasfeylqnegerllleamdelevaf nt |      |
| Homo_sapien ACC2         | VRTDCNHIFLNFVPTVIMDPKIEESVSRMVMRYGSRLWKLRLVLAQELKINIRLTPTGSA   | 1644 |
| Mus_musculu ACC2         | VRTDCNHIFLNFVPTVIMDPKIEESVSRMVMRYGSRLWKLRLVLAQELKINIRLTPTGSA   | 1655 |
| Bos_taurus ACC2          | VRTDCNHIFLNFVPTVIMDPKIEESVSRMVMRYGSRLWKLRLVLAQELKINIRLTPTGSA   | 1617 |
| Capra_hircus ACC2        | VRTDCNHIFLNFVPTVIMDPKIEESVSRMVMRYGSRLWKLRLVLAQELKINIRLTPTGSA   | 1617 |
| Danio_rerio ACC2         | VRTDCNHIFLNFVPTVIMDPKIEESVSRMVMRYGSRLWKLRLVLAQELKINIRLTPTGSA   | 1572 |
| Sparus_aura ACC2         | VRTDCNHIFLNFVPTVIMDPKIEESVSRMVMRYGSRLWKLRLVLAQELKINIRLTPTGSA   | 1624 |
| Lates calcarifer ACC2    | VRTDCNHIFLNFVPTVIMDPKIEESVSRMVMRYGSRLWKLRLVLAQELKINIRLTPTGSA   | 1620 |
| Oncorhynchus mykiss ACC2 | VRTDCNHIFLNFVPTVIMDPKIEESVSRMVMRYGSRLWKLRLVLAQELKINIRLTPTGSA   | 1648 |
| Larimichthys_crocea ACC2 | VRTDCNHIFLNFVPTVIMDPKIEESVSRMVMRYGSRLWKLRLVLAQELKINIRLTPTGSA   | 1616 |
| Consensus                | rtcdcnhiflnfvptvimdp kieesvr mvmrygsrlwklrlvlae kinir t        |      |
| Homo_sapien ACC2         | VPILRLFTNESGGYLDISLYKEVTDPSGQIMFQSYGDKQGPITHGMLINTPVYTKDLLQA   | 1704 |
| Mus_musculu ACC2         | VPILRLFTNESGGYLDISLYKEVTDPSGQIMFQSYGDKQGPITHGMLINTPVYTKDLLQA   | 1715 |
| Bos_taurus ACC2          | VPILRLFTNESGGYLDISLYKEVTDPSGQIMFQSYGDKQGPITHGMLINTPVYTKDLLQA   | 1677 |
| Capra_hircus ACC2        | VPILRLFTNESGGYLDISLYKEVTDPSGQIMFQSYGDKQGPITHGMLINTPVYTKDLLQA   | 1677 |
| Danio_rerio ACC2         | VPILRLFTNESGGYLDISLYKEVTDPSGQIMFQSYGDKQGPITHGMLINTPVYTKDLLQA   | 1632 |
| Sparus_aura ACC2         | VPILRLFTNESGGYLDISLYKEVTDPSGQIMFQSYGDKQGPITHGMLINTPVYTKDLLQA   | 1684 |
| Lates calcarifer ACC2    | VPILRLFTNESGGYLDISLYKEVTDPSGQIMFQSYGDKQGPITHGMLINTPVYTKDLLQA   | 1680 |
| Oncorhynchus mykiss ACC2 | VPILRLFTNESGGYLDISLYKEVTDPSGQIMFQSYGDKQGPITHGMLINTPVYTKDLLQA   | 1708 |
| Larimichthys_crocea ACC2 | VPILRLFTNESGGYLDISLYKEVTDPSGQIMFQSYGDKQGPITHGMLINTPVYTKDLLQA   | 1676 |
| Consensus                | p rlf tnesggyldislye v d g i f s g kgg gmlin pyvtkdllq         |      |
| Homo_sapien ACC2         | KRFQAQSLGTTYVYDFPEMFQALFKLWGPDKYPKDILTYTELVLDSQGQLVEMNRLPG     | 1764 |
| Mus_musculu ACC2         | KRFQAQSLGTTYVYDFPEMFQALFKLWGPDKYPKDILTYTELVLDSQGQLVEMNRLPG     | 1775 |
| Bos_taurus ACC2          | KRFQAQSLGTTYVYDFPEMFQALFKLWGPDKYPKDILTYTELVLDSQGQLVEMNRLPG     | 1737 |
| Capra_hircus ACC2        | KRFQAQSLGTTYVYDFPEMFQALFKLWGPDKYPKDILTYTELVLDSQGQLVEMNRLPG     | 1737 |
| Danio_rerio ACC2         | KRFQAQSLGTTYVYDFPEMFQALFKLWGPDKYPKDILTYTELVLDSQGQLVEMNRLPG     | 1692 |
| Sparus_aura ACC2         | KRFQAQSLGTTYVYDFPEMFQALFKLWGPDKYPKDILTYTELVLDSQGQLVEMNRLPG     | 1744 |
| Lates calcarifer ACC2    | KRFQAQSLGTTYVYDFPEMFQALFKLWGPDKYPKDILTYTELVLDSQGQLVEMNRLPG     | 1740 |
| Oncorhynchus mykiss ACC2 | KRFQAQSLGTTYVYDFPEMFQALFKLWGPDKYPKDILTYTELVLDSQGQLVEMNRLPG     | 1768 |
| Larimichthys_crocea ACC2 | KRFQAQSLGTTYVYDFPEMFQALFKLWGPDKYPKDILTYTELVLDSQGQLVEMNRLPG     | 1736 |
| Consensus                | krfqaq lgtty ydfpemfraq lfk w pkd l elvld lv mnr pg            |      |



|                          |                                                               |      |
|--------------------------|---------------------------------------------------------------|------|
| Homo_sapien ACC2         | CNEVGMVAFKMRFKTQEYPEGRDVIIVICNDITFRIGSFGEEDLLYLRASEARAEGLIK   | 1824 |
| Mus_musculu ACC2         | CNEVGMVAFKMRFKTPEYPEGRDVIIVICNDITFRIGSFGEEDLLYLRASEARAEGLIK   | 1835 |
| Bos_taurus ACC2          | CNEVGMVAFKMRFKTILEYPEGRDIIILISNDITFRIGSFGEEDLLYLRASEARAEGLIK  | 1797 |
| Capra_hircus ACC2        | CNEVGMVAFKMRFKTILEYPEGRDIIILISNDITFRIGSFGEEDLLYLRASEARAEGLIK  | 1797 |
| Danio_rerio ACC2         | DNEVGMVAFKMRFKTPEYPEGRDIIIVICNDITHMIGSFGEEDLLYLRASEARAEGLIK   | 1752 |
| Sparus_aura ACC2         | DNDVGMVAFKMRFKTPEYPEGRDIIIVICNDITHMIGSFGEEDLLYLRASEARAEGLIK   | 1804 |
| Lates calcarifer ACC2    | DNDVGMVAFKMRFKTPEYPEGRDIIIVICNDITHMIGSFGEEDLLYLRASEARAEGLIK   | 1800 |
| Oncorhynchus mykiss ACC2 | DNEVGMVAFKMRFKTPEYPEGRDIIIVICNDITHMIGSFGEEDLLYLRASEARAEGLIK   | 1828 |
| Larimichthys_crocea ACC2 | DNDVGMVAFKMRFKTPEYPEGRDIIIVICNDITHMIGSFGEEDLLYLRASEARAEGLIK   | 1796 |
| Consensus                | n vgm vaf m kt eypegrd i ndit igsfg ed l ase ar egip          |      |
| Homo_sapien ACC2         | TYVAANSGARIGMAEEIKHMFHVAVWDPEDPHGKFKYLYLTPQDYTRISSLSNVHCKHIE  | 1884 |
| Mus_musculu ACC2         | TYLAANSGARIGMAEEIKQIFQVAVWDPEDPHGKFRYLYLTPQDYTRISSLSNVHCKHIE  | 1895 |
| Bos_taurus ACC2          | VYLAANSGARIGLAEEIKHMFQVAVWDPEDPHGKIKYLYLTPQDYTRISSLSNVHCKHVE  | 1857 |
| Capra_hircus ACC2        | VYLAANSGARIGLAEEIKHMFQVAVWDPEDPHGKIKYLYLTPQDYTRISSLSNVHCKHVE  | 1857 |
| Danio_rerio ACC2         | TYISANSGARIGLAEEIRHMFQVAVWDPEDPYKGFYLYLTPQDYTRISSLSNVHCHHVE   | 1812 |
| Sparus_aura ACC2         | TYIAANSGARIGLAEEIKHMFQVAVWDPADPYKGFYLYLTPQDYTRISSTSAVHCHHVE   | 1864 |
| Lates calcarifer ACC2    | VYIAANSGARIGLAEEIKHMFQVAVWDPADPYKGFYLYLTPQDYTRISSTSAVHORHVE   | 1860 |
| Oncorhynchus mykiss ACC2 | TYISANSGARIGLAEEIRHMFQVAVWDPEDPYKGFYLYLTPQDYTRISSTSAVHCHHVE   | 1888 |
| Larimichthys_crocea ACC2 | TYIAANSGARIGLAEEIKHMFQVAVWDPEDPYKGFYLYLTPQDYTRISSTSAVHCHHVE   | 1856 |
| Consensus                | y ansgar g aeel f vaw dp dp kg ylyltpqdyt iss vhc h e         |      |
| Homo_sapien ACC2         | EGGESRYVITDIIIGKDDGLGVENLRGSGMTAGESSLAYEFTVTISVMTCRALGIGAYLVR | 1944 |
| Mus_musculu ACC2         | EGGESRYVITDVIGKDDANLGVENLRGSGMTAGESSLAYEFTVTISVMTCRALGIGAYLVR | 1955 |
| Bos_taurus ACC2          | EDGESRYVITDIIIGKEEGLGVENLRGSGMTAGETSQAYDEIVTISVMTCRALGIGAYLVR | 1917 |
| Capra_hircus ACC2        | EDGESRYVITDIIIGKEEGLGVENLRGSGMTAGETSQAYDEIVTISVMTCRALGIGAYLVR | 1917 |
| Danio_rerio ACC2         | EGGESRYVITDIIIGKEEGLGVENLRGSGMTAGETSQAYKEIITISVMTCRALGIGAYLVR | 1872 |
| Sparus_aura ACC2         | EGGESRYVITDIIIGKDDGIGVENLRGSGMTAGESSQAYEIIITISVMTCRALGIGAYLVR | 1924 |
| Lates calcarifer ACC2    | EGGESRYVITDIIIGKDDGLGVENLRGSGMTAGETSQAYEIIITISVMTCRALGIGAYLVR | 1920 |
| Oncorhynchus mykiss ACC2 | EGGESRYVITDIIIGKDDGLGVENLRGSGMTAGESSQAYEIIITISVMTCRALGIGAYLVR | 1948 |
| Larimichthys_crocea ACC2 | EGGESRYVITDIIIGKDDGLGVENLRGSGMTAGESSQAYEIIITISVMTCRALGIGAYLVR | 1916 |
| Consensus                | gesry d ig gvenlrsgs iage s y tis v cra gigaylvr              |      |
| Homo_sapien ACC2         | LGQRVIQVENSIIILTGASALNKVLGREVYTSNNQLGGVQIMHNGVSHITVPDDFEGVY   | 2004 |
| Mus_musculu ACC2         | LGQRVIQVENSIIILTGAGALNKVLGREVYTSNNQLGGVQIMHNGVSHITVPDDFEGVC   | 2015 |
| Bos_taurus ACC2          | LGQRVIQVENSIIILTGATALNKVLGRDVYTSNNQLGGVQIMHNGVSHITVPDDFEGVC   | 1977 |
| Capra_hircus ACC2        | LGQRVIQVENSIIILTGATALNKVLGRDVYTSNNQLGGVQIMHNGVSHITVPDDFEGVC   | 1977 |
| Danio_rerio ACC2         | LGQRVIQVENSIIILTGAGALNKVLGREVYTSNNQLGGVQIMHNGVTHITVPDDFEGVL   | 1932 |
| Sparus_aura ACC2         | LGQRVIQVENSIIILTGAGALNKVLGREVYTSNNQLGGVQIMHNGVTHITVPDDFEGVF   | 1984 |
| Lates calcarifer ACC2    | LGQRVIQVENSIIILTGAGALNKVLGREVYTSNNQLGGVQIMHNGVTHITVPDDFEGVF   | 1980 |
| Oncorhynchus mykiss ACC2 | LGQRVIQVENSIIILTGAGALNKVLGREVYTSNNQLGGVQIMHNGVTHITVPDDFEGVF   | 2008 |
| Larimichthys_crocea ACC2 | LGQRVIQVENSIIILTGAGALNKVLGREVYTSNNQLGGVQIMHNGVTHITVPDDFEGVF   | 1976 |
| Consensus                | lgqrviqvenshiiltga alnkvlgr vytsnnqlgg qimh ngv h tvpddfegv   |      |
| Homo_sapien ACC2         | TILEWLSYMPKDNHSPVPIITTPDPIREIEFTETRAPYDPRWMLAGRPHPTLKGWQSG    | 2064 |
| Mus_musculu ACC2         | TILEWLSFIPKDNHSPVPIITTPDPIREIEFTETRAPYDPRWMLAGRPHPTLKGWQSG    | 2075 |
| Bos_taurus ACC2          | TILEWLSYMPKDNHSPVPIITPKDPIREIEFTETSRGPYDPRWMLAGRPHPTLKGWQSG   | 2037 |
| Capra_hircus ACC2        | TILEWLSYMPKDNHSPVPIITPKDPIREIEFTETSRGPYNPRWMLAGRPHPTLKGWQSG   | 2037 |
| Danio_rerio ACC2         | TILEWLSYMPKSNHSPVPIKPATDPVDREIDFETRAPYDPRWMLAGRPHPTLKGWQSG    | 1992 |
| Sparus_aura ACC2         | TILEWLSYMPKKNHSPVPIATADPDREIDYETRAPYDPRWMLAGRPHPTLKGWQSG      | 2044 |
| Lates calcarifer ACC2    | TILEWLSYMPKKNHSPVPIATDPDREIEFTETRAPYDPRWMLAGRPHPTLKGWQSG      | 2040 |
| Oncorhynchus mykiss ACC2 | TILEWLSYMPKTHHSPVPIITPKDPIREIEFTETRAPYDPRWMLAGRPHPTLKGWQSG    | 2068 |
| Larimichthys_crocea ACC2 | TILEWLSYMPKKNHSPVPIITDTPDREIEFTETRAPYDPRWMLAGRPHPTLKGWQSG     | 2036 |
| Consensus                | til wls pk spvp dp rei p py prw l grphp g wqsg                |      |
| Homo_sapien ACC2         | FFDHGSFKEIMAPNAQTVVIGRARLGGIPLGVIAVETRTVEVAVPADPANLDSEAKIIQQ  | 2124 |
| Mus_musculu ACC2         | FFDHGSFKEIMAPNAQTVVIGRARLGGIPLGVIAVETRTVEVAVPADPANLDSEAKIIQQ  | 2135 |
| Bos_taurus ACC2          | FFDHGSFKEIMVPAQTVVIGRARLGGIPLGVIAAETRTVELVVPADPANLDSEAKIIQQ   | 2097 |
| Capra_hircus ACC2        | FFDHGSFKEIMVPAQTVVIGRARLGGIPLGVIAAETRTVEVAVPADPANLDSEAKIIQQ   | 2097 |
| Danio_rerio ACC2         | FFDHGSFKEIMATNAQTVVIGRARLGGIPLGVIAVETRTVELAIPADPANLDSEAKLIQQ  | 2052 |
| Sparus_aura ACC2         | FFDHGSFKEIMESNAQTVVIGRARLGGIPLGVIAVETRSVELTIPADPANLDSEAKVLQQ  | 2104 |
| Lates calcarifer ACC2    | FFDHGSFKEIMGSNAQTVVIGRARLGGIPLGVIAVETRSVEFTVPADPANLDSEAKVLQQ  | 2100 |
| Oncorhynchus mykiss ACC2 | FFDHGSFKEIMVGSNAQTVVIGRARLGGIPLGVIAVETRTVEVAIPADPANLDSEAKVLQQ | 2128 |
| Larimichthys_crocea ACC2 | FFDHGSFKEIMESNAQTVVIGRARLGGIPLGVIAVETRTVEFTVPADPANLDSEAKVLQQ  | 2096 |
| Consensus                | f d gsf e m wa tvv grarlggi gv ia etr ve padpanldse qq        |      |
| Homo_sapien ACC2         | AGQVWFPSAANKTAQATDFNREKPLPLMIFANWRGFSGGMKDMYDQVLKFGAYIVDGLRQ  | 2184 |
| Mus_musculu ACC2         | AGQVWFPSAANKTAQATDFNREKPLPLMIFANWRGFSGGMKDMYEQMLKFGAYIVDGLRL  | 2195 |
| Bos_taurus ACC2          | AGQVWFPSAANKTAQATDFNREKPLPLMIFANWRGFSGGMKDMYDQVLKFGAYIVDGLRK  | 2157 |
| Capra_hircus ACC2        | AGQVWFPSAANKTAQATDFNREKPLPLMIFANWRGFSGGMKDMYDQVLKFGAYIVDGLRK  | 2157 |
| Danio_rerio ACC2         | AGQVWFPSAANKTAQATDFNREKPLPLMIFANWRGFSGGMKDMYDQVLKFGAYIVDALRE  | 2112 |
| Sparus_aura ACC2         | AGQVWFPSAANKTAQATDFNREKPLPLMIFANWRGFSGGMKDMYDQVLKFGAYIVDALRG  | 2164 |
| Lates calcarifer ACC2    | AGQVWFPSAANKTAQATDFNREKPLPLMIFANWRGFSGGMKDMYDQVLKFGAYIVDALRG  | 2160 |
| Oncorhynchus mykiss ACC2 | AGQVWFPSAANKTAQATDFNREKPLPLMIFANWRGFSGGMKDMYDQVLKFGAYIVDGLRE  | 2188 |
| Larimichthys_crocea ACC2 | AGQVWFPSAANKTAQATDFNREKPLPLMIFANWRGFSGGMKDMYDQILKFGAYIVDALRG  | 2156 |
| Consensus                | agqvwpfda ktaq dfn e lplm fanwrgfsggm kdm y q lk g yivd l     |      |
| Homo_sapien ACC2         | YKQPILYIYPFAELRGGSWVVIDPTINPLCIEMYADKESRGVLEBEGTVEIKRKKDL     | 2244 |
| Mus_musculu ACC2         | YEQPILYIYPFAELRGGSWVVLDSTINPLCIEMYADKESRGVLEBEGTVEIKRKKDL     | 2255 |
| Bos_taurus ACC2          | YRQPVLIIYPFAEVRGGSWAVDTSINPLCIEMYADRESRASVLEBEGTVEIKYQKKDL    | 2217 |
| Capra_hircus ACC2        | YRQPVLIIYPFAEVRGGSWAVDASINPLCIEMYADRDSRASVLEBEGTVEIKYRKKDL    | 2217 |
| Danio_rerio ACC2         | FSQPVLIIYPFAELRGGSWVVIDPTINLQHMELYADRESRGVLEBEGTVEIKRKKDL     | 2172 |
| Sparus_aura ACC2         | FHQPVLIIYPFAELRGGSWVVIDPTINPLCMELYADKDSRGVLEBEGTVEIKRKKDL     | 2224 |
| Lates calcarifer ACC2    | FHQPVLIIYPFAELRGGSWVVIDPTINPLCMELYADRESRGVLEBEGTVEIKRKKDL     | 2220 |
| Oncorhynchus mykiss ACC2 | FRQPVLIIYPFAELRGGSWVVIDPTINLQHMELYADRESRGVLEBEGTVEIKRKKDL     | 2248 |
| Larimichthys_crocea ACC2 | FHQPVLIIYPFAELRGGSWVVIDPTINPLCMELYADRESRGVLEBEGTVEIKRKKDL     | 2216 |
| Consensus                | qp l yipp ae rggs w v d in e yad sr vle egtveik kdl           |      |



|                          |                                                                 |      |
|--------------------------|-----------------------------------------------------------------|------|
| Homo_sapien ACC2         | IKSMRRIDPAYKKIMEOLGE....PDLSCKDRKDLBGRLKAREDLLLPYHQVAVQFADF     | 2300 |
| Mus_musculu ACC2         | VKTIRRIDPVCCKIVGQIGK....AQLPKDRKLEBGLKAREELLPLPYHQVAVQFADL      | 2311 |
| Bos_taurus ACC2          | VKTIRRIDPISKKIVEOLGV....SELSDTRKLEBGLKAREDLLLPYHQVAVQFADL       | 2273 |
| Capra_hircus ACC2        | VKTIRRIDPVSKKIVEOLGM....SELSDTRKLEBGLKAREDLLLPYHQVAVQFADL       | 2273 |
| Danio_rerio ACC2         | LKTMRRIDPVYSRLAEQLGK....PDIPSQERKDLBAKLKAREELLPLPYHQVAVQFVDL    | 2228 |
| Sparus_aura ACC2         | LKTMRRIDSVYAGIVEQLAS....PBLSDKQSRLEBLKLKAREELLPLPYHQVAVQFVEL    | 2280 |
| Lates calcarifer ACC2    | LKTMRRIDSVYASIVDQLAS....PBLSDKQCKELBAKLKAREELLPLPYHQVAVQFVDL    | 2276 |
| Oncorhynchus mykiss ACC2 | LKTMRRIDSVYAGIAEQKQPGTPEITDKQRKDLBAKLKAREELLPLPYHQVAVQFVDL      | 2308 |
| Larimichthys_crocea ACC2 | LKTMRRIDSVYAGIVEQLAS....LPLSDKQCKELBSKLKAREELLPLPYHQVAVQFVEL    | 2272 |
| Consensus                | k rr d l ql l le l re l p yhqva f                               |      |
| Homo_sapien ACC2         | HDTFGRMLEKGVISDILEWKTARTFFLYWRLRRLLEDOVKCEILCASGELSHVHIQSMLR    | 2360 |
| Mus_musculu ACC2         | HDTPGHMLEKGITSDVLEWKTARTFFLYWRLRRLLEBAQVKCEILRASPEINHEHIQSMLR   | 2371 |
| Bos_taurus ACC2          | HDTAGRMLEKGVINDILEWKTARSTFFLYWRLRRLLEBQVKCEILRACPELSHMHVQSMLR   | 2333 |
| Capra_hircus ACC2        | HDKAGRMLEKGVINDILEWKTARSTFFLYWRLRRLLEBQVKCEILRACPELSHMHVQSMLR   | 2333 |
| Danio_rerio ACC2         | HDTFGRMCEKGVITDILDWKTARSTFFLYWRLRRLLEBQVKCEILCANQELSDGHVQSMLR   | 2288 |
| Sparus_aura ACC2         | HDTFGRMCEKGVITDILDWKNVRTFFLYWRLRRLLEBQVKCEILCANAEISDGHVQSMLR    | 2340 |
| Lates calcarifer ACC2    | HDTFGRMCEKGVITDILDWKNVRTFFLYWRLRRLLEBQVKCEILCANKLSDGHVQSMLR     | 2336 |
| Oncorhynchus mykiss ACC2 | HDTFGRMHEKGAITDILDWKNVSTFFLYWRLRRLLEBQVKCEILCANPEISDGHVQSMLR    | 2368 |
| Larimichthys_crocea ACC2 | HDTFGRMCEKGVITDILDWKNVRTFFLYWRLRRLLEBQVKCEILCANKLSDGHVQSMLR     | 2332 |
| Consensus                | hd g m ekg i d l wk r ywrlrrllle vke a l h qsmrlr               |      |
| Homo_sapien ACC2         | RWFVETEGAVKAYLWDNNQVAVVWLEBQHQAQGLGERSITIRENITYLKHDSVLKTIIRGLV  | 2419 |
| Mus_musculu ACC2         | RWFVETEGAVKAYLWDSNQVAVVWLEBQHWSAKDGLRSTIRENINYLKRDSVLKTIQSLV    | 2430 |
| Bos_taurus ACC2          | RWFVETEGAVKAYLWDNNQVAVVWLEBAHQASGLHSTIRENITCLRRDSALKTIQGLV      | 2392 |
| Capra_hircus ACC2        | RWFVETEGAVKAYLWDNNQVAVVWLEBHQAGGLHSTIRENIACLKRDALKTIIRGLV       | 2392 |
| Danio_rerio ACC2         | RWFVETEGAVKAYLWDNNKAVVWLEPNNSQDGLTRSVIRENICKIKRDYALKHIRSLV      | 2347 |
| Sparus_aura ACC2         | RWFVETEGTVKAYLWDNNQAVVWLEBKHLPEDGLTRSAIRENICKYLRKRENTLKHIRSLV   | 2399 |
| Lates calcarifer ACC2    | RWFVETEGTVKAYLWDNNQAVVWLEBKHLSQBDGLTRSAIRENICKYLRKRENTLKHIRSLV  | 2395 |
| Oncorhynchus mykiss ACC2 | RWFVETEGTVKAYLWDNNKAVVWLEBKHLLAKEDGLTRSAIRENICKYLRDHALKHIRSLV   | 2427 |
| Larimichthys_crocea ACC2 | RWFVETEGTVKAYLWDNNQAVVWLEBKHLSSEEDGLTRSAIRENICKYLRKRENTLKHIRSLV | 2391 |
| Consensus                | rwfveteg v aylwd n vv wle g s ireni lk i v                      |      |
| Homo_sapien ACC2         | BENFEVAVDCVIYILSCHISFAERAQVHLLSTMDSPAS                          | 2457 |
| Mus_musculu ACC2         | QEHFEVIMDCVAYILSCHLTFEAETIQVAQLLSTTESPAS                        | 2468 |
| Bos_taurus ACC2          | QENPELAMDSLVIYISCHISFAERAQVIHLLSTTDGPAS                         | 2430 |
| Capra_hircus ACC2        | QENPELAMDSLVIYISCHISFAERAQVIHLLSTVDGPAS                         | 2430 |
| Danio_rerio ACC2         | QANPEVTMDCIHMAQNITFSQRAKVCHLLATMDNSTT                           | 2385 |
| Sparus_aura ACC2         | QANPDLAMDCIHHMSQNTFSQRAELSHLLATMDDTST                           | 2437 |
| Lates calcarifer ACC2    | QANPDVAMDCIHHMSQNTFSQRAKLHLLATVDNTST                            | 2433 |
| Oncorhynchus mykiss ACC2 | QANPEVTMDCIHMSQNTFSQRAKISHLLATMDGTAP                            | 2465 |
| Larimichthys_crocea ACC2 | QANPDVAMDCIHHMSHNTFSQRAKLSHLLATMDSTST                           | 2429 |
| Consensus                | p d p r ll t                                                    |      |

**Figure S4 Multiple sequence alignment of the deduced AA sequences of large yellow croaker ACC2 with other fish species or mammals.** Sequences comparison was performed using DNAMAN, and the identity/similarity shading is based on a 75% identity threshold. Identical residues are shown in dark blue shading and similar residues are shown in wathet blue shading. The identity shading is based on 81% identity threshold.
